# Supplementary material for: YAP Activation Drives Liver Regeneration after Cholestatic Damage Induced by Rbpj Deletion
Source: PubMed Central journal article supplement (PMC6321044; doi:10.3390/ijms19123801), 2018-11-29
Supplement: ijms-19-03801-s001.pdf [file ijms-19-03801-s001.pdf]

Supplementary Figures

Figure S1

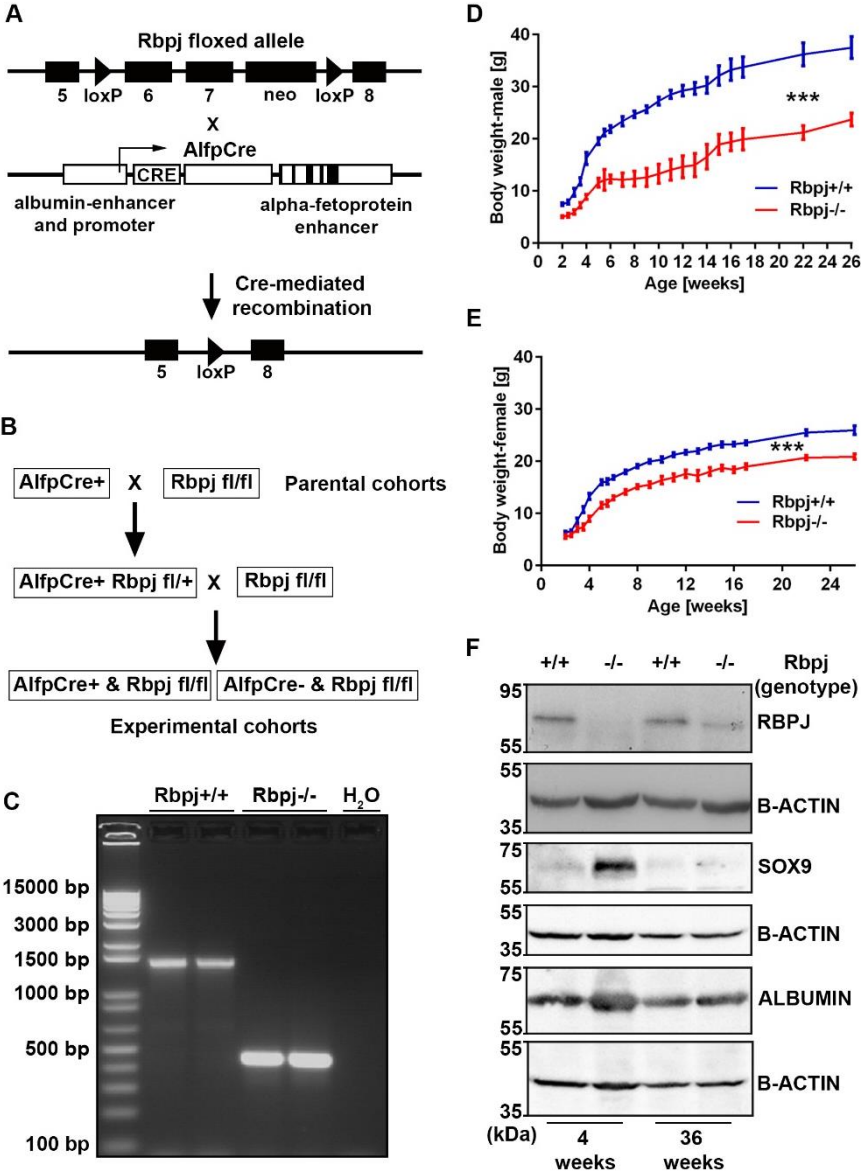

**Figure S1.** Generation of experimental cohorts and *Rbpj* expression in the liver. (A) Scheme of transgenic construct design of conditional *Rbpj* knockout and *AlfpCre* mice [18,19]. (B) Breeding strategy for the generation of experimental cohorts. (C) PCR analysis of recombination on liver DNA from *Rbpj*<sup>+/+</sup>, and *Rbpj*<sup>-/-</sup> mice. The *Rbpj* wild-type band is localised at 1500 bp whereas *Rbpj* knockout band can be seen at 490 bp. (D + E) Weight curves of *Rbpj*<sup>+/+</sup> and *Rbpj*<sup>-/-</sup> mice, *Rbpj*<sup>-/-</sup> mice show a persistent lower body weight in male ( $n = 9-12$ ; \*\*\*  $p \leq 0.001$ , Pearson coefficient correlation (Two tailed)) (D) and female mice ( $n = 11-16$ ; \*\*\*  $p \leq 0.001$ , Pearson coefficient correlation (Two tailed)) (E) group. (F) Immunoblot of RBPJ, SOX9 (progenitor/cholangiocytic marker) and Albumin (hepatocytic marker) of whole liver lysates from 4 and 36 weeks old *Rbpj*<sup>+/+</sup> and *Rbpj*<sup>-/-</sup> mice ( $n = 2$ ).

Figure S2

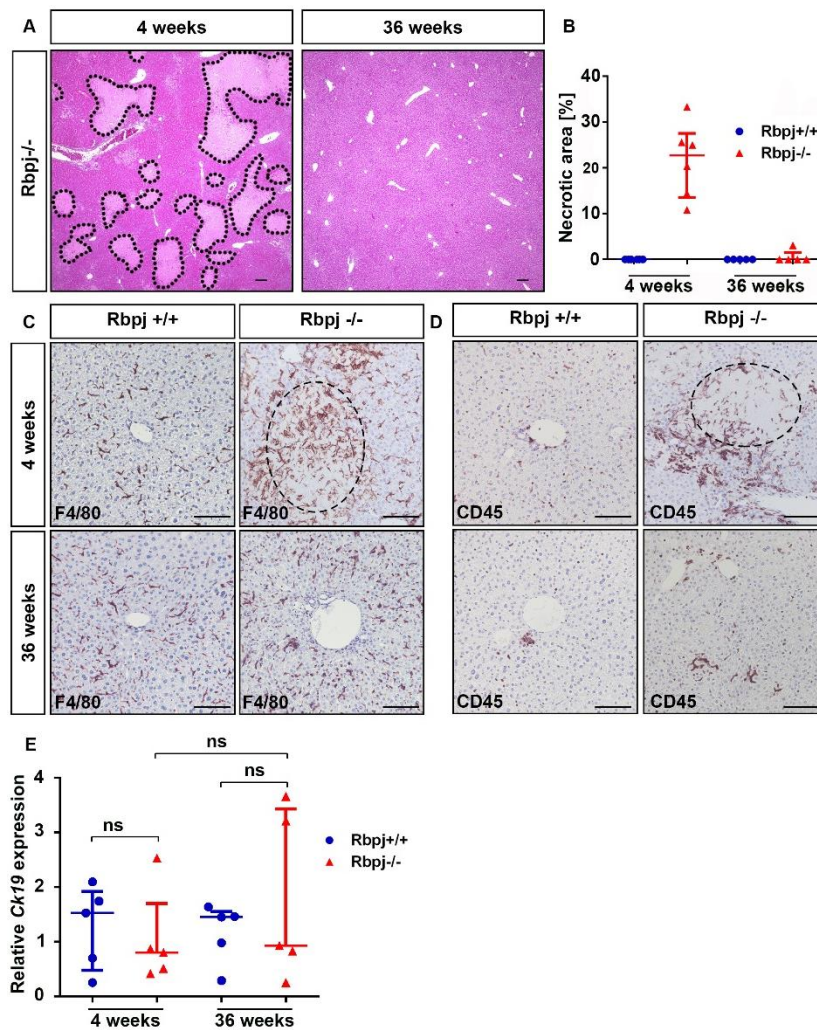

**Figure S2.** Loss of RBPJ results in hepatic necrosis. (A) Photographs of macroscopic liver from *Rbpj*<sup>-/-</sup> mice at 4 and 36 weeks ( $n = 5-6$ ; scale bar: 100  $\mu\text{m}$ ; dotted lines surround the necrotic areas). (B) Scatter dot plots depict the necrotic area in the liver of *Rbpj*<sup>-/-</sup> mice. *Rbpj*<sup>+/+</sup> mice did not show necrosis ( $n = 5-6$ ). (C) Representative photographs of F4/80-immunostaining ( $n = 3$ ; scale bar: 100  $\mu\text{m}$ ; dotted line surround the necrotic area). (D) CD45-immunostaining of liver from 4 and 36 weeks old *Rbpj*<sup>+/+</sup> and *Rbpj*<sup>-/-</sup> mice, Necrotic area is highlighted by dotted line ( $n = 3$ ; scale bar: 100  $\mu\text{m}$ ; dotted lines represent necrotic area). (E) Scatter dot plots shows *Ck19* mRNA expression ( $n = 5$ ; Mann-Whitney test (Two tailed)).

Figure S3

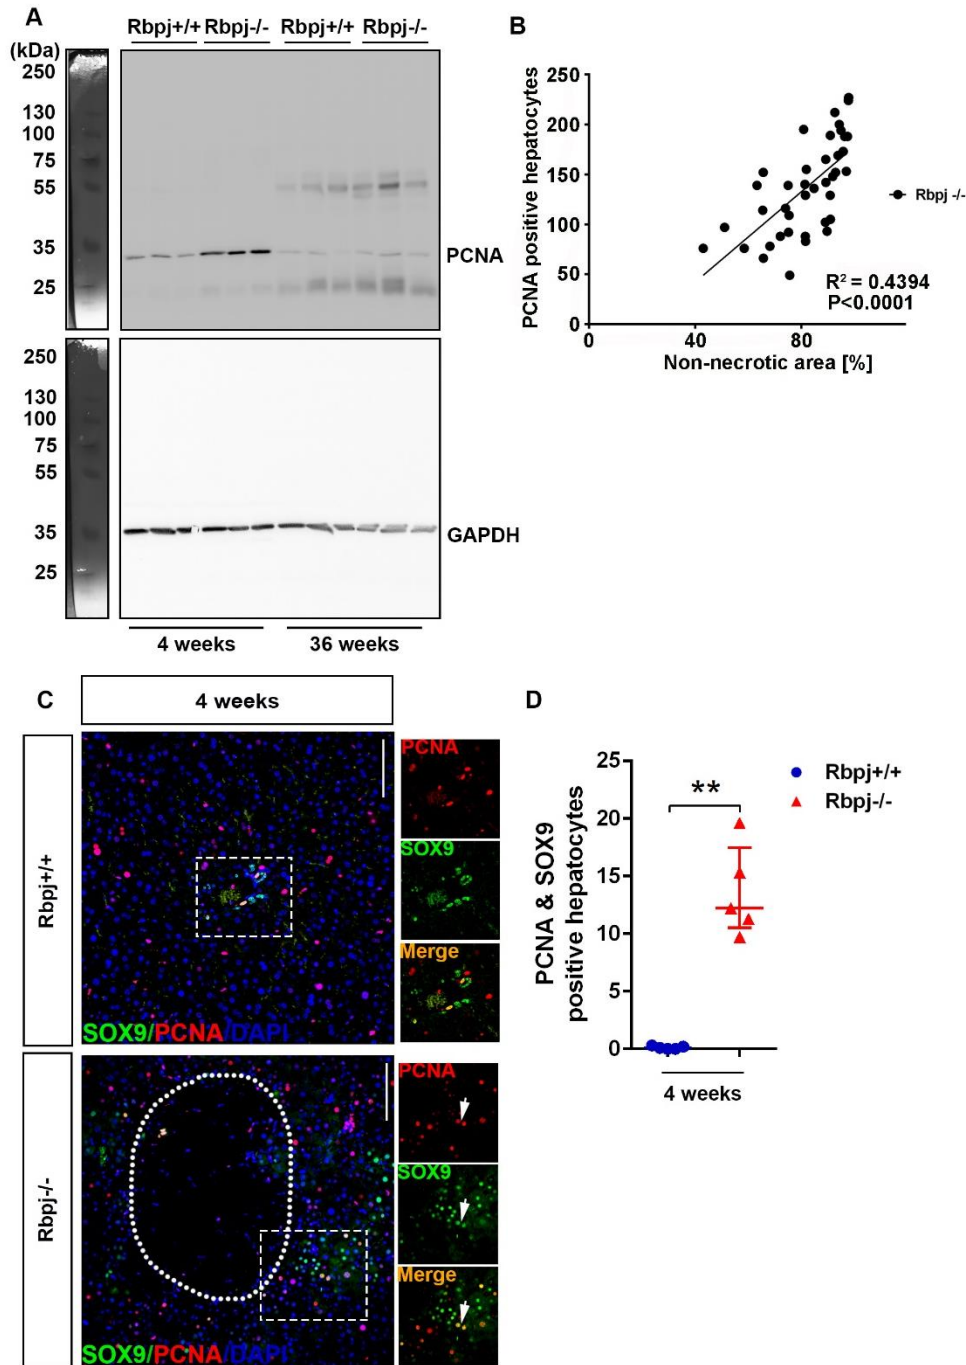

**Figure S3.** RBPJ deficiency induced cholestasis introduces regenerative proliferation. (A) Full-length scan of immunoblot for proliferation marker PCNA of whole liver lysates from *Rbpj*<sup>+/+</sup> and *Rbpj*<sup>-/-</sup> mice at 4 and 36 weeks of age. GAPDH was used as a loading control ( $n = 3$ ). Molecular weight marker is depicted on a separated bright-field image. (B) The number of PCNA positive hepatocytes positively correlate with the non-necrotic area in the liver of 4 weeks old *Rbpj*<sup>-/-</sup> mice ( $n = 10-11$ ; Pearson correlation coefficient,  $R^2 = 0.4394$ ,  $P < 0.0001$ ). (C) Representative photographs of co-immunostaining for the progenitor/cholangiocytic marker SOX9 and the proliferation marker PCNA in liver of 4 weeks old *Rbpj*<sup>+/+</sup> and *Rbpj*<sup>-/-</sup> mice ( $n = 5$ ; scale bar: 100  $\mu\text{m}$ ; PCNA: red, SOX9: green, DAPI: blue). The dotted circle represents necrotic area. The marked area is shown as single channels for the detection of PCNA positive cells (red) and SOX9 positive cells (green) and an overlay of both channel. (D) Quantification of PCNA and SOX9 positive hepatocytes in liver from 4 weeks old *Rbpj*<sup>+/+</sup> and *Rbpj*<sup>-/-</sup> mice ( $n = 5$ ; \*\*  $p \leq 0.01$ , Mann-Whitney test (Two tailed)).

Figure S4

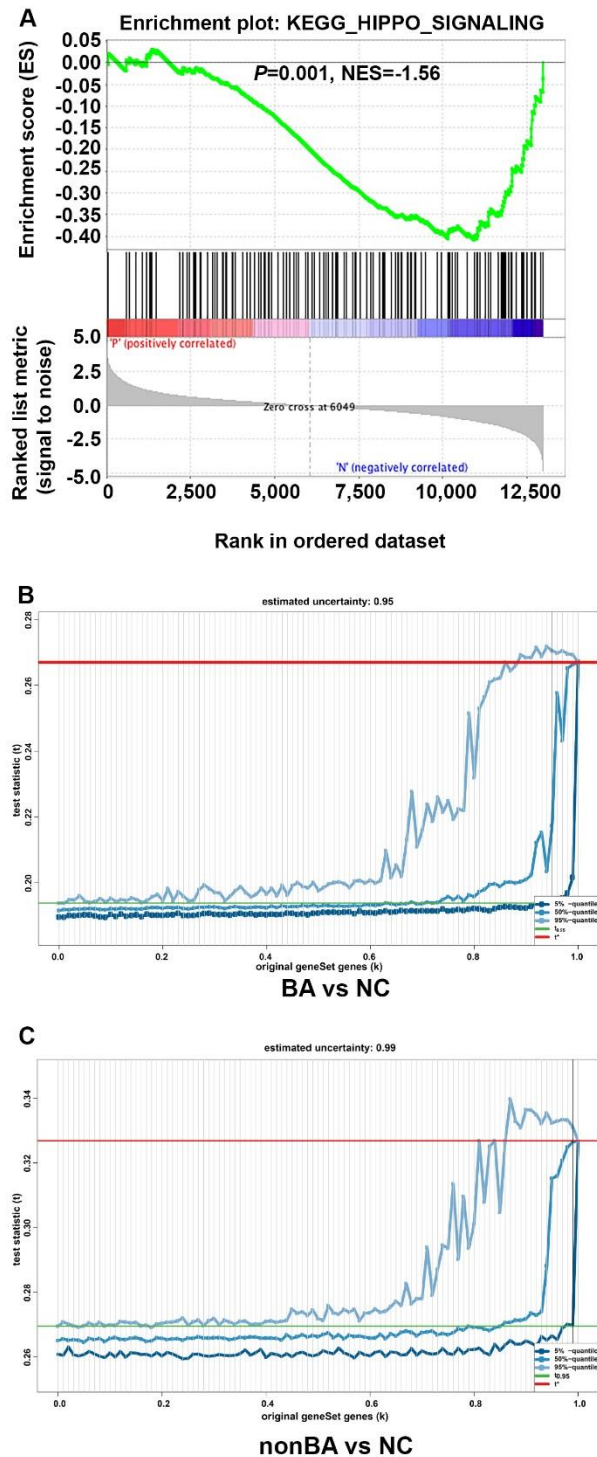

**Figure S4.** Deregulation of the Hippo pathway gene set in *Rbpj* deleted mice and in human CLD patients. (A) Microarray data for liver from 4 weeks old *Rbpj*<sup>+/+</sup> vs *Rbpj*<sup>-/-</sup> mice (GSE121302) were analysed using GSEA software to identify significant gene sets. The enrichment plot shows the distribution of genes from the KEGG Hippo pathway gene set (mmu04390). (B,C) GiANT shows a significant deregulation of the Hippo pathway gene set (hsa04390) in (B) BA vs. control patients and (C) nonBA vs. control patients.

Figure S5

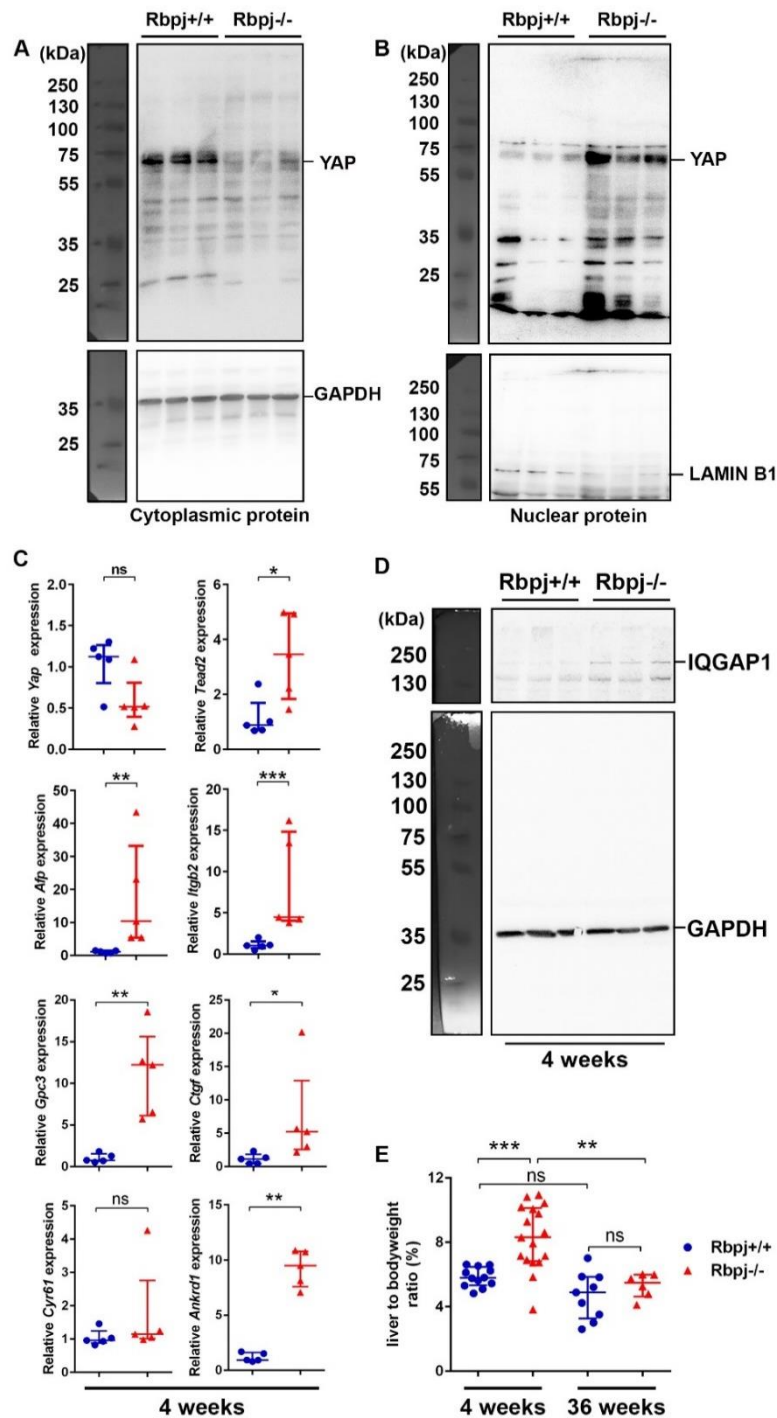

**Figure S5.** Nuclear translocation of YAP after *Rbpj*<sup>-/-</sup> induced liver injury. (A,B) Corresponding full-length scan of immunoblots of cytoplasmic and nuclear YAP in the liver of *Rbpj*<sup>+/+</sup> and *Rbpj*<sup>-/-</sup> mice to data presented in cropped Figure 5C. Molecular weight marker is depicted on a separated bright-field image. (C) Relative RNA expression of Hippo pathway regulators *Yap* and *Tead2* and YAP downstream targets *Afp*, *Itgb2*, *Gpc3*, *Ctgf*, *Cyr61* and *Ankrd1* ( $n = 5$ ; \*\*\*  $p \leq 0.001$ , \*\*  $p \leq 0.01$ , \*  $p \leq 0.05$ , ns = non-significant; Mann-Whitney test (Two tailed)). (D) Full-length scan of immunoblot of IQGAP1 (horizontally cropped) correspond to data presented in cropped Figure 5E. Molecular weight marker is depicted on a separated bright-field image. (E) Liver to bodyweight ratio of *Rbpj*<sup>+/+</sup> and *Rbpj*<sup>-/-</sup> mice at 4 and 36 weeks of age ( $n = 6-17$ ; \*\*\*  $p \leq 0.001$ , \*\*  $p \leq 0.01$ , ns= non-significant; Mann-Whitney test (Two tailed)).



Figure S6

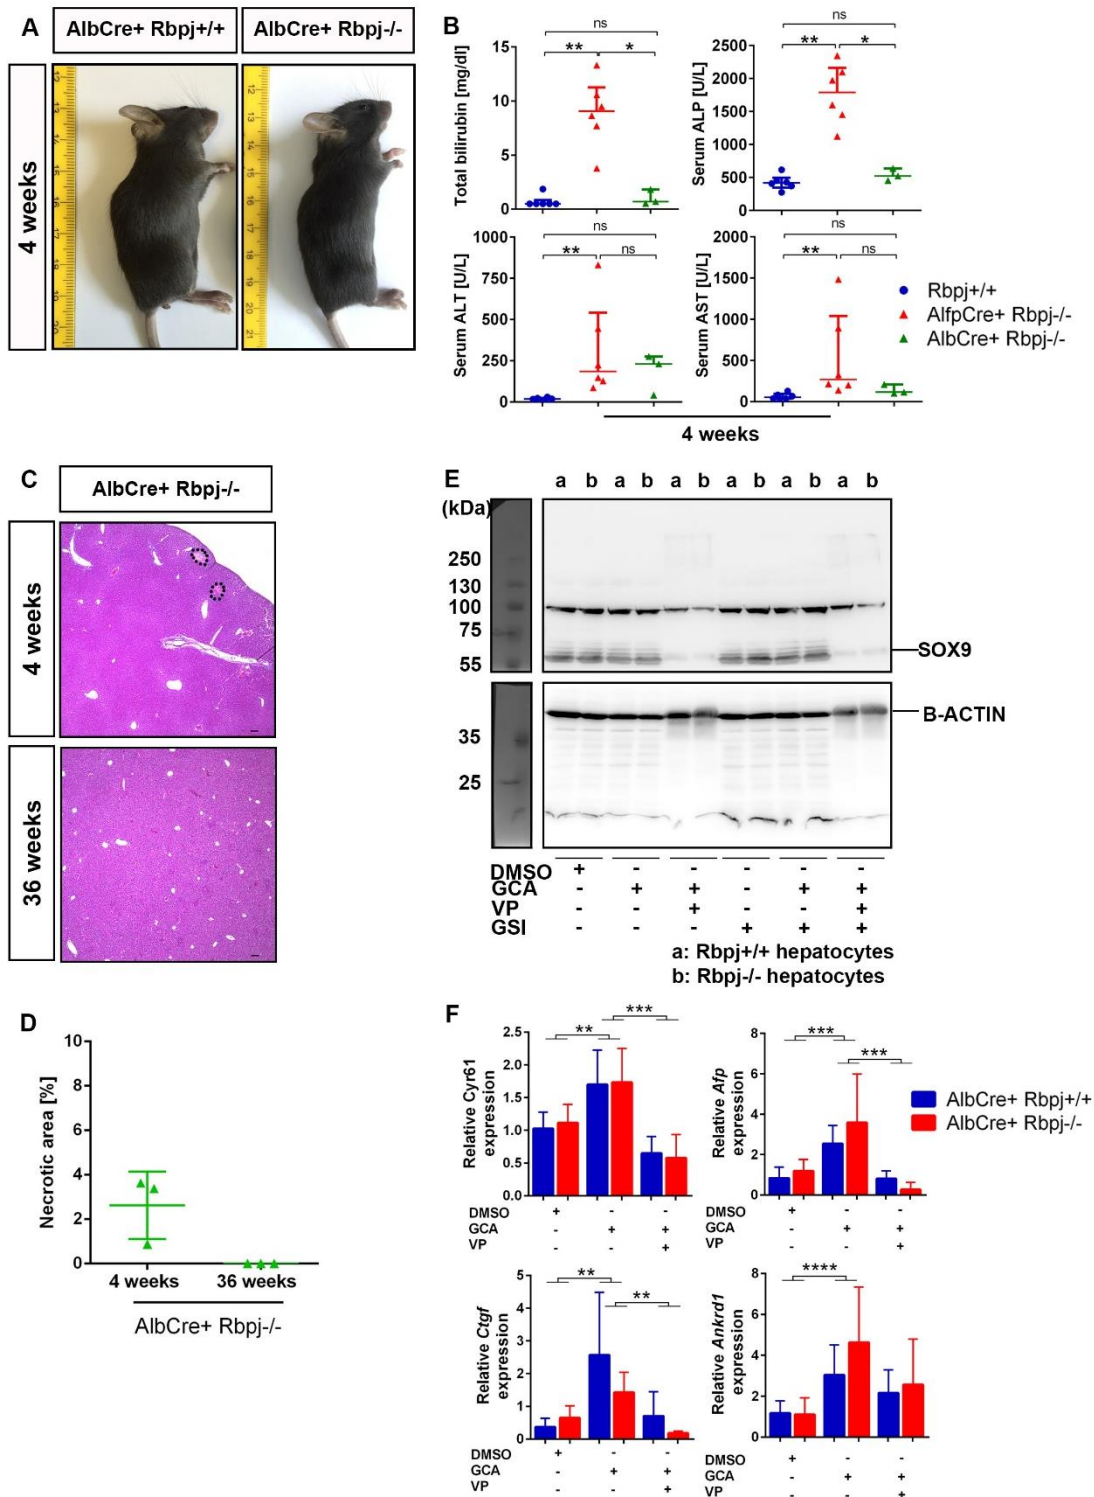

**Figure S6.** *AlbCre* mediated loss of *Rbpj*. (A) Representative macroscopic photographs of *AlbCre*<sup>+</sup> *Rbpj*<sup>+/+</sup> and *AlbCre*<sup>+</sup> *Rbpj*<sup>-/-</sup> mice at 4 weeks of age ( $n = 3$ ). (B) Scatter dot plots of TB (total bilirubin), ALP (alkaline phosphatase), ALT (alanine transaminase) and AST (aspartate transaminase) measured in mouse serum from 4 weeks old *AlfpCre*<sup>+</sup> *Rbpj*<sup>-/-</sup>, *AlbCre*<sup>+</sup> *Rbpj*<sup>+/+</sup> and *AlbCre*<sup>+</sup> *Rbpj*<sup>-/-</sup> mice ( $n = 3-6$ ; \*\*  $p \leq 0.01$ , \*  $p \leq 0.05$ , Mann-Whitney test (Two tailed)). Only ALT marker is slightly increased upon *Rbpj* deletion in *AlbCre*<sup>+</sup> *Rbpj*<sup>-/-</sup> mice. (C) Representative H&E photographs from *AlbCre*<sup>+</sup> *Rbpj*<sup>-/-</sup> mice at 4 and 36 weeks depicting small necrotic areas in 4 weeks old *AlbCre*<sup>+</sup> *Rbpj*<sup>-/-</sup> mice ( $n = 3$ ; scale bar: 100  $\mu\text{m}$ , dotted lines represents necrotic areas). (D) Scatter dot plots represent the necrotic area in the liver

of *AlbCre<sup>+</sup> Rbpj<sup>-/-</sup>* mice ( $n = 3$ ). (E) Corresponding full-length scan of immunoblot is horizontally cropped for the separate detection of SOX9 and  $\beta$ -Actin (whole-cell protein). Correspond to data presented in cropped Figure 6D. Molecular weight marker is depicted on a separated bright-field image. (F) Relative RNA expression of *Cyr61*, *Afp*, *Ctgf* and *Ankrd1* in primary hepatocytes from *AlbCre<sup>+</sup> Rbpj<sup>+/+</sup>* and *AlbCre<sup>+</sup> Rbpj<sup>-/-</sup>* mice after GCA and GCA/VP treatment ( $n = 5$ ; \*\*\*\*  $p \leq 0.0001$ , \*\*\*  $p \leq 0.001$ , \*\*  $p \leq 0.01$ , \*  $p \leq 0.05$ , Mann-Whitney test (Two tailed)).

## Supplementary Tables

**Table S1.** Enriched KEGG pathways.

| KEGG-Pathways                             | Gene Size | Intersection Size | False Discovery Rate |
|-------------------------------------------|-----------|-------------------|----------------------|
| METABOLIC_PATHWAYS                        | 1230      | 101               | 4.40E-10             |
| PI3K-AKT_SIGNALING_PATHWAY                | 355       | 37                | 2.27E-06             |
| PATHWAYS_IN_CANCER                        | 326       | 29                | 0.000602417          |
| HTLV-I_INFECTION                          | 290       | 28                | 0.000142525          |
| CYTOKINE-CYTOKINE_RECEPTOR_INTERACTION    | 273       | 31                | 1.23E-06             |
| MAPK_SIGNALING_PATHWAY                    | 259       | 25                | 0.000497632          |
| VIRAL_CARCINOGENESIS                      | 236       | 16                | 0.04207037           |
| ENDOCYTOSIS                               | 225       | 17                | 0.026686827          |
| EPSTEIN-BARR_VIRUS_INFECTION              | 220       | 17                | 0.018968375          |
| REGULATION_OF_ACTIN_CYTOSKELETON          | 217       | 26                | 1.44E-05             |
| FOCAL_ADHESION                            | 205       | 33                | 1.38E-09             |
| ALCOHOLISM                                | 202       | 16                | 0.005436578          |
| CHEMOKINE_SIGNALING_PATHWAY               | 198       | 29                | 1.46E-08             |
| CALCIUM_SIGNALING_PATHWAY                 | 185       | 15                | 0.02930663           |
| TRANSCRIPTIONAL_MISREGULATION_IN_CANCER   | 181       | 16                | 0.007818261          |
| PHAGOSOME                                 | 180       | 31                | 4.40E-10             |
| TUBERCULOSIS                              | 179       | 25                | 1.57E-06             |
| INFLUENZA_A                               | 172       | 15                | 0.013058534          |
| HIPPO_SIGNALING_PATHWAY                   | 156       | 14                | 0.017665702          |
| NATURAL_KILLER_CELL_MEDIATED_CYTOTOXICITY | 155       | 20                | 2.43E-05             |
| HEPATITIS_B                               | 149       | 17                | 0.000662977          |
| SYSTEMIC_LUPUS_ERYTHEMATOSUS              | 147       | 17                | 4.02E-05             |
| INSULIN_SIGNALING_PATHWAY                 | 140       | 12                | 0.033808161          |
| VASCULAR_SMOOTH_MUSCLE_CONTRACTION        | 136       | 12                | 0.029256413          |
| AXON_GUIDANCE                             | 133       | 14                | 0.005272863          |
| SEROTONERGIC_SYNAPSE                      | 130       | 13                | 0.007977282          |
| CELL_CYCLE                                | 129       | 21                | 1.00E-06             |
| OSTEOCLAST_DIFFERENTIATION                | 127       | 25                | 1.75E-09             |
| LYSOSOME                                  | 124       | 20                | 2.26E-06             |
| NEUROTROPHIN_SIGNALING_PATHWAY            | 123       | 13                | 0.006348471          |
| LEUKOCYTE_TRANSENDOTHELIAL_MIGRATION      | 121       | 21                | 6.00E-07             |
| AMOEBIASIS                                | 120       | 26                | 4.40E-10             |
| OOCYTE_MEIOSIS                            | 115       | 13                | 0.003392808          |
| CHOLINERGIC_SYNAPSE                       | 114       | 10                | 0.043511615          |
| HIF-1_SIGNALING_PATHWAY                   | 113       | 15                | 0.000289593          |
| TOXOPLASMOSIS                             | 113       | 11                | 0.021591468          |

|                                                  |     |    |             |
|--------------------------------------------------|-----|----|-------------|
| T_CELL_RECEPTOR_SIGNALING_PATHWAY                | 110 | 13 | 0.002701362 |
| CHAGAS_DISEASE                                   | 104 | 15 | 0.000199555 |
| NF-KAPPA_B_SIGNALING_PATHWAY                     | 103 | 12 | 0.001673957 |
| TOLL-<br>LIKE_RECEPTOR_SIGNALING_PATHWAY         | 101 | 12 | 0.003467801 |
| CIRCADIAN_ENTRAINMENT                            | 99  | 10 | 0.021591468 |
| ARACHIDONIC_ACID_METABOLISM                      | 98  | 14 | 0.000216025 |
| DRUG_METABOLISM_CYTOCHROME_P450                  | 97  | 16 | 5.67E-06    |
| METABOLISM_OF_XENOBIOTICS_BY_CYTO<br>CHROME_P450 | 96  | 19 | 6.61E-08    |
| CHEMICAL_CARCINOGENESIS                          | 95  | 17 | 1.23E-06    |
| FC_GAMMA_R-MEDIATED_PHAGOCYTOSIS                 | 92  | 22 | 9.77E-10    |
| PROGESTERONE                                     | 89  | 9  | 0.029078089 |
| GNRH_SIGNALING_PATHWAY                           | 89  | 9  | 0.029673656 |
| PROSTATE_CANCER                                  | 89  | 9  | 0.029673656 |
| GAP_JUNCTION                                     | 88  | 13 | 0.000359935 |
| PROTEIN_DIGESTION_AND_ABSORPTION                 | 88  | 10 | 0.011079573 |
| ECM-RECEPTOR_INTERACTION                         | 87  | 15 | 3.41E-05    |
| HEMATOPOIETIC_CELL_LINEAGE                       | 87  | 11 | 0.00336888  |
| ERBB_SIGNALING_PATHWAY                           | 87  | 11 | 0.003790869 |
| SMALL_CELL_LUNG_CANCER                           | 86  | 11 | 0.003488665 |
| RHEUMATOID_ARTHRITIS                             | 84  | 13 | 0.000257738 |
| RETINOL_METABOLISM                               | 83  | 11 | 0.000978177 |
| TGF-BETA_SIGNALING_PATHWAY                       | 83  | 8  | 0.048932522 |
| PPAR_SIGNALING_PATHWAY                           | 81  | 11 | 0.002127223 |
| PEROXISOME                                       | 81  | 9  | 0.017665702 |
| PHOSPHATIDYLINOSITOL_SIGNALING_SYS<br>TEM        | 81  | 9  | 0.020136032 |
| SALMONELLA_INFECTION                             | 79  | 11 | 0.001937438 |
| B_CELL_RECEPTOR_SIGNALING_PATHWAY                | 78  | 13 | 0.000114631 |
| SALIVARY_SECRETION                               | 77  | 10 | 0.005335128 |
| COMPLEMENT_AND_COAGULATION_CAS<br>CADES          | 76  | 14 | 2.12E-05    |
| ADHERENS_JUNCTION                                | 75  | 9  | 0.010951802 |
| CHRONIC_MYELOID_LEUKEMIA                         | 74  | 9  | 0.010217549 |
| PERTUSSIS                                        | 73  | 13 | 7.13E-05    |
| MELANOMA                                         | 73  | 9  | 0.008628681 |
| BILE_SECRETION                                   | 72  | 11 | 0.001064948 |
| FC_EPSILON_RI_SIGNALING_PATHWAY                  | 71  | 11 | 0.000786329 |
| BACTERIAL_INVASION_OF_EPITHELIAL_CE<br>LLS       | 70  | 9  | 0.007977282 |
| P53_SIGNALING_PATHWAY                            | 69  | 7  | 0.046484703 |
| RENAL_CELL_CARCINOMA                             | 69  | 7  | 0.046484703 |
| PANCREATIC_CANCER                                | 67  | 12 | 0.000139531 |
| LEISHMANIASIS                                    | 66  | 15 | 1.23E-06    |
| GLIOMA                                           | 66  | 12 | 0.00011098  |
| GLYCOLYSIS_GLUONEOGENESIS                        | 66  | 10 | 0.001406944 |
| VEGF_SIGNALING_PATHWAY                           | 66  | 7  | 0.044228701 |
| COLORECTAL_CANCER                                | 64  | 10 | 0.00157458  |
| DRUG_METABOLISM_OTHER_ENZYMES                    | 61  | 8  | 0.005312502 |
| INOSITOL_PHOSPHATE_METABOLISM                    | 61  | 7  | 0.033808161 |
| LEGIONELLOSIS                                    | 59  | 9  | 0.002620862 |
| NOD-<br>LIKE_RECEPTOR_SIGNALING_PATHWAY          | 59  | 7  | 0.028680537 |
| STEROID_HORMONE_BIOSYNTHESIS                     | 58  | 14 | 3.52E-07    |
| GLYCEROLIPID_METABOLISM                          | 56  | 8  | 0.006348471 |



|                                             |    |    |             |
|---------------------------------------------|----|----|-------------|
| MALARIA                                     | 55 | 11 | 8.15E-05    |
| GLUTATHIONE_METABOLISM                      | 55 | 10 | 0.000410474 |
| NON-SMALL_CELL_LUNG_CANCER                  | 55 | 8  | 0.005771628 |
| STARCH_AND_SUCROSE_METABOLISM               | 53 | 10 | 0.000114631 |
| STAPHYLOCOCCUS_AUREUS_INFECTION             | 52 | 14 | 2.92E-07    |
| FANCONI_ANEMIA_PATHWAY                      | 52 | 6  | 0.042288568 |
| ENDOMETRIAL_CANCER                          | 52 | 6  | 0.045035893 |
| TYPE_II_DIABETES_MELLITUS                   | 50 | 7  | 0.014378328 |
| AMINO_SUGAR_AND_NUCLEOTIDE_SUGAR_METABOLISM | 49 | 7  | 0.010596964 |
| FATTY_ACID_METABOLISM                       | 48 | 7  | 0.00959166  |
| ABC_TRANSPORTERS                            | 46 | 6  | 0.030660707 |
| PORPHYRIN_AND_CHLOROPHYLL_METABOLISM        | 43 | 8  | 0.000617247 |
| PYRUVATE_METABOLISM                         | 43 | 7  | 0.006880665 |
| SPHINGOLIPID_METABOLISM                     | 41 | 8  | 0.001358947 |
| FRUCTOSE_AND_MANNOSE_METABOLISM             | 40 | 8  | 0.001002815 |
| ALDOSTERONE-REGULATED_SODIUM_REABSORPTION   | 40 | 7  | 0.004986944 |
| BASE_EXCISION_REPAIR                        | 39 | 5  | 0.029673656 |
| DNA_REPLICATION                             | 36 | 9  | 9.60E-05    |
| PRION_DISEASES                              | 35 | 7  | 0.002506143 |
| PENTOSE_AND_GLUCURONATE_INTERCONVERSIONS    | 34 | 12 | 1.51E-08    |
| GALACTOSE_METABOLISM                        | 31 | 7  | 0.00129682  |
| BUTANOATE_METABOLISM                        | 31 | 5  | 0.021647451 |
| ASCORBATE_AND_ALDARATE_METABOLISM           | 27 | 6  | 0.000978177 |
| VITAMIN_DIGESTION_AND_ABSORPTION            | 24 | 4  | 0.040651071 |
| MISMATCH_REPAIR                             | 23 | 4  | 0.031060801 |
| GLYCOSAMINOGLYCAN_DEGRADATION               | 21 | 4  | 0.028680537 |
| SULFUR_METABOLISM                           | 11 | 4  | 0.003418509 |
| SYNTHESIS_AND_DEGRADATION_OF_KETONE_BODIES  | 11 | 3  | 0.020651069 |

Table represents list of enriched KEGG pathways in whole liver tissue of *Rbpj<sup>+/+</sup>* and *Rbpj<sup>-/-</sup>* mice at the age of 4 weeks. Table shows gene set size, intersection size and false discovery rate for each single pathway ( $n = 3-4$ , Fisher's exact test,  $fdr < 0.05$ ).

Table S2. Differentially regulated genes.

| Gene               | Log2 Fold Change | False Discovery Rate |
|--------------------|------------------|----------------------|
| SULT2A1            | 9.851442969      | 3.06E-09             |
| SULT2A4            | 9.808841664      | 1.35E-13             |
| SULT2A2            | 9.700201106      | 3.39E-08             |
| ENSMUST00000121135 | 8.126654798      | 1.35E-13             |
| LRTM2              | 7.150394141      | 2.44E-09             |
| IGDCC4             | 7.011721889      | 2.44E-09             |
| H19                | 6.803596774      | 0.000954713          |
| GIPC2              | 6.71165252       | 5.44E-06             |
| KRT20              | 6.526805469      | 1.35E-13             |
| SPINK3             | 6.512761648      | 1.35E-13             |
| SULT1E1            | 6.453821301      | 0.028990591          |

|                    |             |             |
|--------------------|-------------|-------------|
| SULT2A6            | 6.168625668 | 6.90E-10    |
| SCD2               | 5.954048258 | 1.21E-11    |
| LCN2               | 5.641675788 | 0.005818331 |
| TCEAL5             | 5.559467642 | 5.44E-07    |
| UBD                | 5.548400939 | 0.024306258 |
| HKDC1              | 5.302800512 | 1.85E-06    |
| S100G              | 5.265316127 | 1.31E-06    |
| BMPER              | 5.141137394 | 0.005818331 |
| TIMP1              | 5.135291809 | 0.099516918 |
| ENSMUST00000040703 | 4.966763664 | 1.35E-13    |
| AKR1B7             | 4.921120317 | 0.005818331 |
| ELOVL7             | 4.885913221 | 1.32E-07    |
| GNPMB              | 4.863316341 | 0.003229661 |
| GLOD5              | 4.850266376 | 1.35E-13    |
| GM3776             | 4.704583134 | 0.000774517 |
| OSBPL3             | 4.69758438  | 1.35E-13    |
| PRR15L             | 4.618857373 | 1.35E-13    |
| 5730559C18RIK      | 4.618355655 | 6.75E-06    |
| SLC22A29           | 4.611978031 | 0.014937438 |
| CD14               | 4.589637345 | 0.00216544  |
| ORM3               | 4.547618187 | 7.86E-08    |
| MYOM3              | 4.46650509  | 0.001466487 |
| ELF3               | 4.438428827 | 0.009923494 |
| CCL2               | 4.435052061 | 0.003229661 |
| IFNLR1             | 4.425924904 | 1.35E-13    |
| SPRR1A             | 4.418043304 | 0.001466487 |
| RASAL1             | 4.367456938 | 3.06E-09    |
| BEX1               | 4.310830819 | 0.001466487 |
| PPL                | 4.307147269 | 1.35E-13    |
| ARHGAP22           | 4.163173582 | 2.44E-09    |
| PBK                | 4.161804206 | 0.007581085 |
| CHIL1              | 4.160336118 | 3.84E-05    |
| IL13RA2            | 4.136030848 | 8.29E-11    |
| WNT10A             | 4.110943424 | 1.35E-13    |
| PYGB               | 4.089629132 | 7.10E-05    |
| BC100530           | 4.08803171  | 5.69E-06    |
| CXCL1              | 3.992729169 | 0.0734861   |
| CXCL5              | 3.964574092 | 1.35E-13    |
| IFI27L2B           | 3.934879342 | 1.35E-13    |
| TOP2A              | 3.896093594 | 0.005818331 |
| CIDEA              | 3.895105822 | 0.002188424 |
| PAK1               | 3.886654951 | 0.005147085 |
| SLC51B             | 3.885615298 | 1.77E-07    |
| ENSMUST00000095071 | 3.863177767 | 0.099516918 |
| FFAR4              | 3.837122129 | 0.000346571 |
| TUBB3              | 3.828369714 | 0.000226234 |
| STFA2L1            | 3.828120579 | 0.014937438 |
| CALML4             | 3.81756269  | 1.35E-13    |
| TNFAIP3            | 3.813479821 | 0.005818331 |

|                    |             |             |
|--------------------|-------------|-------------|
| GM10639            | 3.785127557 | 0.007581085 |
| SMPD3              | 3.775204622 | 1.21E-11    |
| MYO7B              | 3.749274494 | 4.87E-10    |
| FOS                | 3.737032347 | 5.44E-07    |
| 4930415O20RIK      | 3.724876421 | 0.014937438 |
| RNF138RT1          | 3.709451094 | 0.000346571 |
| CCDC120            | 3.70443112  | 0.005818331 |
| A_55_P2024391      | 3.6983378   | 0.037937888 |
| ENSMUST00000077110 | 3.691780728 | 1.40E-06    |
| RETNLG             | 3.688870132 | 0.005818331 |
| ADAMTS4            | 3.66547627  | 1.35E-13    |
| GPX3               | 3.638837874 | 0.000167342 |
| CACNA2D4           | 3.629506089 | 1.35E-13    |
| AUNIP              | 3.619373802 | 0.000774517 |
| SH3PXD2B           | 3.610954145 | 0.005818331 |
| EMB                | 3.600907112 | 0.004840579 |
| TREM2              | 3.584377671 | 0.007581085 |
| EPDR1              | 3.571531964 | 0.000346571 |
| PDK3               | 3.57061184  | 0.000226234 |
| SERPINB6D          | 3.568395122 | 1.71E-05    |
| TC1661613          | 3.563238318 | 0.099516918 |
| TFF3               | 3.562779006 | 1.35E-13    |
| MGST2              | 3.528877289 | 0.007581085 |
| NEDD9              | 3.527107015 | 0.001466487 |
| CX3CR1             | 3.525954373 | 0.007581085 |
| 4930427A07RIK      | 3.517972255 | 0.005818331 |
| PLAUR              | 3.508837964 | 0.029429781 |
| STFA1              | 3.504006539 | 0.023459349 |
| EXO1               | 3.499500448 | 0.003669217 |
| 1700016C15RIK      | 3.465034151 | 6.15E-07    |
| CD36               | 3.462142373 | 1.35E-13    |
| GM5483             | 3.452850276 | 7.10E-05    |
| INPP5J             | 3.448146668 | 0.004640056 |
| GSTA2              | 3.445770597 | 0.053870316 |
| RAD51              | 3.445443049 | 0.099516918 |
| FIGNL1             | 3.425772797 | 0.000506785 |
| IER3               | 3.421857578 | 0.0734861   |
| EPS8L3             | 3.403922179 | 4.86E-05    |
| ADAMTS15           | 3.403736278 | 0.003669217 |
| IRAK3              | 3.363356686 | 0.0734861   |
| 9130017K11RIK      | 3.355272467 | 3.24E-07    |
| WFDC3              | 3.349986727 | 0.037937888 |
| SERPINB6B          | 3.349939683 | 0.014937438 |
| GRRP1              | 3.346006158 | 1.37E-05    |
| SERPINB6A          | 3.339463191 | 1.35E-13    |
| IL1R2              | 3.330651384 | 6.75E-05    |
| SERPINB6C          | 3.324530061 | 3.39E-08    |
| NRG1               | 3.307193354 | 0.002188424 |
| CCL7               | 3.294318303 | 0.028990591 |

|                           |             |             |
|---------------------------|-------------|-------------|
| BUB1                      | 3.28491747  | 0.004640056 |
| RAB44                     | 3.277317802 | 0.000774517 |
| FERMT3                    | 3.238495676 | 0.0734861   |
| CCL6                      | 3.236960306 | 0.000166554 |
| 9530077C05RIK             | 3.179569445 | 1.35E-13    |
| NTF3                      | 3.172695952 | 0.024306258 |
| IQGAP3                    | 3.161702649 | 0.002188424 |
| ALPK1                     | 3.157341205 | 5.44E-07    |
| ANLN                      | 3.152704056 | 0.000954713 |
| ENSMUST00000111315        | 3.151923355 | 5.44E-06    |
| MARCO                     | 3.151582738 | 0.000954713 |
| ATF3                      | 3.132022346 | 0.001466487 |
| WFDC16                    | 3.130901213 | 0.037937888 |
| BUB1B                     | 3.100235562 | 0.005818331 |
| PLXNA3                    | 3.099028764 | 0.002188424 |
| PI16                      | 3.096679485 | 6.15E-07    |
| CHR11:35805295-35817263_F | 3.089096117 | 1.77E-07    |
| SCUBE1                    | 3.076851287 | 0.001324416 |
| SERPINA7                  | 3.073277823 | 0.024803337 |
| BMP8B                     | 3.071683723 | 0.011102126 |
| CTSJ                      | 3.071457146 | 0.002188424 |
| TREH                      | 3.071412579 | 0.005818331 |
| ADRB2                     | 3.047740544 | 0.014937438 |
| CNN1                      | 3.047632532 | 0.000954713 |
| SMOC2                     | 3.044138357 | 1.35E-13    |
| EID2                      | 3.033634113 | 0.024803337 |
| C1QTNF6                   | 3.02524307  | 3.06E-09    |
| FGL2                      | 3.024342084 | 0.007581085 |
| CD300LB                   | 3.012551457 | 6.90E-10    |
| FAM105A                   | 3.010758303 | 1.32E-07    |
| SIRPB1B                   | 3.010224915 | 0.000954713 |
| ABCB1A                    | 2.998166661 | 6.15E-07    |
| GUCA2B                    | 2.994088808 | 0.043182203 |
| DTL                       | 2.993434022 | 0.099516918 |
| AA986860                  | 2.980665993 | 0.005818331 |
| PRC1                      | 2.977956398 | 5.44E-06    |
| LYSMD2                    | 2.96229441  | 0.099516918 |
| ENSMUST00000043503        | 2.96193716  | 0.079872805 |
| ENSMUST00000143791        | 2.960076437 | 1.40E-06    |
| CLEC4D                    | 2.951017283 | 1.40E-06    |
| GOLM1                     | 2.940913134 | 1.35E-13    |
| PLK1                      | 2.937737032 | 0.000774517 |
| AFP                       | 2.934659184 | 6.15E-07    |
| 1810053B23RIK             | 2.932434462 | 0.000954713 |
| B4GALT6                   | 2.931551654 | 0.000774517 |
| RASD1                     | 2.927395989 | 0.014937438 |
| SDCBP2                    | 2.923038712 | 0.002188424 |
| PLA2G7                    | 2.920718163 | 7.02E-09    |
| NEURL3                    | 2.919983687 | 0.011102126 |

|                    |             |             |
|--------------------|-------------|-------------|
| MSANTD3            | 2.917275586 | 1.32E-07    |
| ENSMUST00000107229 | 2.910285695 | 0.0734861   |
| ERCC6L             | 2.907878012 | 1.77E-07    |
| LYZ2               | 2.903452675 | 5.44E-06    |
| TAGLN2             | 2.901081208 | 1.21E-11    |
| POLQ               | 2.897567431 | 0.003669217 |
| SGOL2A             | 2.897412856 | 0.014937438 |
| CENPI              | 2.894453814 | 0.014937438 |
| POPDC2             | 2.879367817 | 0.005818331 |
| RAB31              | 2.873682052 | 0.004640056 |
| ENSMUST00000181735 | 2.870095284 | 0.000162979 |
| B3GALNT1           | 2.868151103 | 0.000506785 |
| DEPDC1B            | 2.867999979 | 0.0734861   |
| NEU3               | 2.863996239 | 0.014937438 |
| EGR2               | 2.863440041 | 0.043182203 |
| MFGE8              | 2.854371257 | 1.35E-13    |
| MXD3               | 2.849724371 | 0.000346571 |
| IFITM6             | 2.849310661 | 0.000346571 |
| TNFRSF12A          | 2.839123601 | 0.014937438 |
| TBX1               | 2.827572756 | 1.35E-13    |
| RCAN2              | 2.827561302 | 5.44E-06    |
| 2210011C24RIK      | 2.818866562 | 7.10E-05    |
| ANXA2              | 2.818686615 | 4.87E-10    |
| A_55_P2034227      | 2.81255734  | 3.24E-07    |
| PLS1               | 2.807355522 | 0.000162979 |
| CCDC3              | 2.800977843 | 3.84E-05    |
| MCM5               | 2.793541996 | 0.0734861   |
| BICC1              | 2.782471656 | 4.85E-12    |
| SIRPB1A            | 2.773756482 | 0.005147085 |
| AURKA              | 2.77329198  | 1.37E-05    |
| ENSMUST00000120059 | 2.764008522 | 0.000346571 |
| TMEM139            | 2.758032341 | 0.002188424 |
| NOXA1              | 2.75192591  | 5.44E-07    |
| FANCI              | 2.745316041 | 0.029429781 |
| UBE2C              | 2.744294268 | 0.002188424 |
| CCR2               | 2.731082813 | 0.024306258 |
| S100A11            | 2.729704194 | 6.76E-06    |
| ESPL1              | 2.724320454 | 0.059268219 |
| CLCA3A2            | 2.713650725 | 3.06E-09    |
| RGS1               | 2.713485002 | 0.002188424 |
| DDR1               | 2.713303732 | 0.029429781 |
| ADGRG1             | 2.712092325 | 1.32E-07    |
| NUSAP1             | 2.70790881  | 0.029429781 |
| BCL2A1C            | 2.69745698  | 0.014937438 |
| C5AR1              | 2.692966874 | 0.037937888 |
| SERPINA3I          | 2.692314701 | 0.011102126 |
| PMAIP1             | 2.689201987 | 0.0734861   |
| TFF2               | 2.687357642 | 0.001466487 |
| SLC41A3            | 2.675868467 | 6.75E-05    |

|                          |             |             |
|--------------------------|-------------|-------------|
| NCAPG2                   | 2.672822174 | 0.011102126 |
| CYB561                   | 2.664675116 | 0.000167342 |
| VILL                     | 2.663615743 | 0.000162979 |
| PLP2                     | 2.658259741 | 0.079872805 |
| LGALS3                   | 2.658213121 | 0.000189142 |
| NAP112112-1              | 2.654966056 | 0.002188424 |
| SLC16A3                  | 2.651489674 | 0.000954713 |
| KRT31                    | 2.650668509 | 0.000346571 |
| OLIG1                    | 2.648731722 | 0.005818331 |
| NMUR2                    | 2.648079969 | 0.000107205 |
| ENSMUST00000190026       | 2.642635882 | 1.71E-05    |
| CLEC4E                   | 2.638392671 | 3.39E-08    |
| GPRC5B                   | 2.630784972 | 0.000162979 |
| CEBPD                    | 2.615604802 | 0.059268219 |
| NID1                     | 2.611497703 | 4.86E-05    |
| LRR1                     | 2.60999886  | 0.005818331 |
| CHR5:35893909-35899497_F | 2.599027408 | 0.014937438 |
| TBC1D9                   | 2.598901281 | 6.75E-05    |
| PKIA                     | 2.585466809 | 0.002188424 |
| MUC13                    | 2.580743259 | 0.000506785 |
| THBD                     | 2.573627626 | 0.059268219 |
| CD63                     | 2.573422875 | 0.005818331 |
| TNFRSF21                 | 2.569137888 | 0.0734861   |
| ASPRV1                   | 2.569073329 | 1.37E-05    |
| MS4A7                    | 2.567315661 | 1.37E-05    |
| CSF2RB2                  | 2.566636589 | 0.009923494 |
| ALS2CR12                 | 2.562546422 | 0.079872805 |
| GALNT3                   | 2.558859486 | 0.000107205 |
| CD53                     | 2.5510666   | 0.0734861   |
| DSCC1                    | 2.548155987 | 0.024306258 |
| A_55_P2050044            | 2.545196062 | 0.059268219 |
| CCNA2                    | 2.540735498 | 0.005818331 |
| P3H2                     | 2.537922227 | 0.000954713 |
| SDK1                     | 2.523414177 | 1.35E-13    |
| CLEC1A                   | 2.518529853 | 0.002188424 |
| ANXA5                    | 2.512818558 | 3.06E-09    |
| CHR9:78104935-78116974_F | 2.506685355 | 0.0734861   |
| MCM2                     | 2.499787054 | 0.002188424 |
| PROM1                    | 2.498473561 | 0.0734861   |
| ACNAT2                   | 2.4934596   | 0.000954713 |
| ENTPD1                   | 2.493326391 | 1.35E-13    |
| ATP11A                   | 2.485947602 | 0.003229661 |
| CENPH                    | 2.485767617 | 0.043182203 |
| NPDC1                    | 2.483546971 | 1.45E-11    |
| KNTC1                    | 2.477569049 | 0.037937888 |
| SYT12                    | 2.47267556  | 7.99E-11    |
| RAB3B                    | 2.47227438  | 0.003229661 |
| COL4A3                   | 2.470712509 | 0.024306258 |
| A_55_P2063146            | 2.454585957 | 0.005818331 |



|                    |             |             |
|--------------------|-------------|-------------|
| B930041F14RIK      | 2.443567229 | 0.003669217 |
| MS4A8A             | 2.441472037 | 8.29E-11    |
| CLIC6              | 2.438500968 | 1.35E-13    |
| MTMR11             | 2.437003404 | 0.000107205 |
| ISYNA1             | 2.434148608 | 5.44E-07    |
| MKI67              | 2.433121319 | 0.001466487 |
| 3110035E14RIK      | 2.424095173 | 0.089012317 |
| ACMSD              | 2.423451052 | 0.014937438 |
| 5330417C22RIK      | 2.420952158 | 3.73E-05    |
| SHCBP1             | 2.418690505 | 0.028990591 |
| TMEM98             | 2.413279075 | 8.29E-11    |
| FAM64A             | 2.404403079 | 0.024306258 |
| MMP8               | 2.400737006 | 0.028990591 |
| CRYM               | 2.393590916 | 0.007581085 |
| ASPM               | 2.387600083 | 0.099516918 |
| GAL3ST1            | 2.387086549 | 0.004640056 |
| ATP6V0D2           | 2.379044725 | 0.099516918 |
| GJA1               | 2.377121679 | 0.024306258 |
| NAPSA              | 2.375906721 | 0.037937888 |
| CDCA5              | 2.373872285 | 8.57E-06    |
| CBR2               | 2.369802092 | 0.012257839 |
| CLDN7              | 2.368872909 | 0.043182203 |
| PODXL              | 2.368473649 | 1.35E-13    |
| TMPRSS2            | 2.368035131 | 0.000346571 |
| ENSMUST00000193767 | 2.364894584 | 0.001466487 |
| TFRC               | 2.360355015 | 0.028990591 |
| GM11937            | 2.358787431 | 2.81E-09    |
| GRAMD1B            | 2.350771308 | 1.71E-05    |
| RAB39              | 2.349016671 | 0.029429781 |
| ANKRD1             | 2.344369396 | 0.099516918 |
| BEX4               | 2.341041405 | 0.000346571 |
| OSMR               | 2.340684757 | 0.000506785 |
| CKAP2              | 2.338714036 | 0.079872805 |
| RACGAP1            | 2.336785544 | 0.011102126 |
| IGFBP1             | 2.336540455 | 1.37E-05    |
| A_55_P2025829      | 2.332756421 | 1.37E-05    |
| ENC1               | 2.332277722 | 0.002188424 |
| A_55_P2038452      | 2.331117163 | 0.043182203 |
| MS4A6D             | 2.326695458 | 0.005818331 |
| STMN1              | 2.32263545  | 0.029429781 |
| CCDC80             | 2.320798009 | 0.005147085 |
| RDH9               | 2.319065571 | 6.15E-07    |
| CLDN6              | 2.316278783 | 0.004840579 |
| ZC2HC1A            | 2.314089436 | 0.000189142 |
| IL33               | 2.313432401 | 0.079872805 |
| ACOT10             | 2.311647445 | 0.005147085 |
| CENPE              | 2.311118626 | 0.003229661 |
| ALOX5              | 2.304598833 | 1.40E-06    |
| BCL2A1D            | 2.292360739 | 6.15E-07    |

|                    |             |             |
|--------------------|-------------|-------------|
| PANX1              | 2.286362694 | 1.71E-05    |
| FCGR3              | 2.283678418 | 3.24E-07    |
| CBR3               | 2.282174876 | 0.024306258 |
| A_55_P2020072      | 2.270358587 | 0.003669217 |
| GATSL3             | 2.268481458 | 0.000107205 |
| SGOL1              | 2.266324266 | 0.000346571 |
| FHL2               | 2.261117427 | 0.037937888 |
| PARPBP             | 2.258839977 | 0.029429781 |
| ADAM8              | 2.25243597  | 0.009923494 |
| P2RY14             | 2.249965227 | 0.009923494 |
| LPL                | 2.24877024  | 3.39E-08    |
| MCM4               | 2.24809439  | 0.003229661 |
| HAVCR2             | 2.24735062  | 0.099516918 |
| ENSMUST00000165104 | 2.242351332 | 8.57E-06    |
| EXOC3L4            | 2.241223799 | 0.0734861   |
| CAPZA2             | 2.239066977 | 0.007581085 |
| A_55_P2005972      | 2.219323359 | 0.029429781 |
| ENSMUST00000191760 | 2.219113317 | 6.15E-07    |
| TM4SF4             | 2.189096747 | 1.45E-11    |
| CENPT              | 2.188763191 | 0.002188424 |
| RND2               | 2.185049013 | 0.005818331 |
| GSTA4              | 2.180937039 | 0.024306258 |
| CYTIP              | 2.177807764 | 0.005147085 |
| CD93               | 2.174159011 | 0.003229661 |
| NAP111417-1        | 2.17009075  | 6.76E-06    |
| FADS3              | 2.160571563 | 0.000346571 |
| 5730416F02RIK      | 2.155339292 | 3.24E-07    |
| WFDC17             | 2.150949611 | 0.000506785 |
| GM5936             | 2.149201439 | 0.000189142 |
| ENSMUST00000022099 | 2.148754164 | 0.099516918 |
| OIP5               | 2.147393432 | 0.049978137 |
| DXBAY18            | 2.146888686 | 0.005147085 |
| GM9733             | 2.143407529 | 0.001324416 |
| TACC3              | 2.142451997 | 0.000774517 |
| SERPINA3N          | 2.139315271 | 0.023459349 |
| SHC2               | 2.138790023 | 0.0734861   |
| CDC25C             | 2.135831692 | 0.0734861   |
| THBS2              | 2.135435512 | 0.028990591 |
| CTTNBP2NL          | 2.134806773 | 0.087334443 |
| ABCC1              | 2.132272953 | 2.81E-09    |
| UAP1L1             | 2.13002399  | 0.005147085 |
| IL1B               | 2.123385804 | 0.000107205 |
| CLEC4N             | 2.119078908 | 5.44E-07    |
| ENSMUST00000118082 | 2.116850568 | 0.000954713 |
| A_55_P2145136      | 2.112251924 | 0.000506785 |
| NR4A1              | 2.107821576 | 0.014937438 |
| ARHGEF39           | 2.107246367 | 0.0734861   |
| TPPP3              | 2.096904173 | 0.024306258 |
| MCM6               | 2.096614889 | 0.000107205 |

|                           |             |             |
|---------------------------|-------------|-------------|
| PPAP2A                    | 2.095120604 | 6.76E-06    |
| TROAP                     | 2.093365294 | 0.099516918 |
| ABCC4                     | 2.090107183 | 1.71E-05    |
| ADM                       | 2.090073929 | 0.000107205 |
| CD5L                      | 2.088859896 | 8.57E-06    |
| GLIPR1                    | 2.086201245 | 0.014937438 |
| KIF22                     | 2.082529784 | 0.005818331 |
| EVPL                      | 2.08179842  | 0.0734861   |
| MYO5A                     | 2.077041575 | 0.099516918 |
| GM5150                    | 2.076481668 | 0.024306258 |
| CAR13                     | 2.076289945 | 6.85E-07    |
| CHR2:77715502-77719430_F  | 2.075473423 | 0.014937438 |
| LOC102642410              | 2.068425986 | 0.043182203 |
| CFAP69                    | 2.068316691 | 1.10E-09    |
| TMEM106A                  | 2.066502028 | 0.003669217 |
| DIAP3                     | 2.062364689 | 0.005818331 |
| LUM                       | 2.060916111 | 0.000346571 |
| PIK3R5                    | 2.058507302 | 0.015085602 |
| EMILIN2                   | 2.057501519 | 0.001538172 |
| CLEC4A3                   | 2.05373857  | 0.0734861   |
| A_55_P2002460             | 2.048723989 | 0.028990591 |
| SCN1B                     | 2.04803695  | 0.005818331 |
| GM38958                   | 2.047386057 | 5.44E-06    |
| EREG                      | 2.047092812 | 0.005818331 |
| CLEC4B1                   | 2.044436314 | 0.024803337 |
| CTSS                      | 2.041781943 | 3.39E-08    |
| SMC2                      | 2.038614929 | 7.10E-05    |
| FABP7                     | 2.036288825 | 7.02E-09    |
| SLC44A4                   | 2.035156757 | 0.043182203 |
| CD83                      | 2.032356422 | 0.012257839 |
| ASF1B                     | 2.030872261 | 3.06E-09    |
| RAPGEF5                   | 2.029560838 | 0.001466487 |
| H2-Q1                     | 2.029293822 | 3.73E-05    |
| VWF                       | 2.028021189 | 0.000166554 |
| SGK1                      | 2.023620789 | 0.014937438 |
| HN1                       | 2.022928076 | 0.002188424 |
| VCAM1                     | 2.018648813 | 0.029429781 |
| ACTG2                     | 2.015810408 | 0.023459349 |
| SPON1                     | 2.014496794 | 0.005147085 |
| RNASEL                    | 2.011058417 | 0.099516918 |
| C1QB                      | 2.009530539 | 1.31E-06    |
| ORM2                      | 2.005426831 | 0.005818331 |
| CD38                      | 2.005065845 | 3.39E-08    |
| CHR19:61226425-61270975_F | 2.001785373 | 0.0734861   |
| NCAPH                     | 2.00132479  | 1.77E-07    |
| TYROBP                    | 1.999491895 | 3.39E-08    |
| GM11223                   | 1.998944114 | 0.037937888 |
| LILRB4                    | 1.997389095 | 0.005147085 |
| DAPP1                     | 1.99682631  | 1.20E-06    |

|                          |             |             |
|--------------------------|-------------|-------------|
| PLET1                    | 1.993582474 | 0.003229661 |
| LY6E                     | 1.991561674 | 8.29E-11    |
| CNR1                     | 1.991351882 | 0.037937888 |
| LGALS1                   | 1.987735615 | 4.87E-10    |
| LRRC75A                  | 1.98706649  | 0.014937438 |
| AMZ1                     | 1.985401854 | 0.000506785 |
| TLR2                     | 1.980283335 | 0.001466487 |
| EAR1                     | 1.979334002 | 1.85E-06    |
| VAV1                     | 1.977964049 | 0.003669217 |
| ACTG1                    | 1.972301746 | 0.000167342 |
| PLAT                     | 1.971790864 | 0.037937888 |
| KIF20B                   | 1.969997506 | 0.023459349 |
| GPR176                   | 1.966939826 | 1.60E-10    |
| GINS2                    | 1.966843274 | 0.0734861   |
| ADGRE1                   | 1.965079045 | 5.44E-06    |
| PPM1J                    | 1.959156135 | 0.005818331 |
| LACC1                    | 1.959032012 | 0.000506785 |
| H2-DMA                   | 1.957824052 | 0.002188424 |
| REEP1                    | 1.956940487 | 0.029429781 |
| LYZ1                     | 1.95568612  | 0.004840579 |
| CFAP45                   | 1.953883665 | 0.099516918 |
| KRT8                     | 1.952221767 | 0.000107205 |
| SPEER4B                  | 1.950069564 | 1.37E-05    |
| NIPA1                    | 1.94899761  | 0.029429781 |
| RGS19                    | 1.947961735 | 0.000954713 |
| CYBB                     | 1.945144731 | 0.005818331 |
| KLF6                     | 1.940435365 | 0.005147085 |
| A_55_P2063426            | 1.939661746 | 0.002188424 |
| EME1                     | 1.930259202 | 0.059268219 |
| PLAC8                    | 1.929252357 | 8.57E-06    |
| CDC6                     | 1.921630542 | 0.028990591 |
| RELB                     | 1.919791565 | 7.10E-05    |
| TFEC                     | 1.917058298 | 0.043182203 |
| CAND2                    | 1.916537594 | 0.014937438 |
| ABCG1                    | 1.915119305 | 1.37E-05    |
| CHRD2                    | 1.914483602 | 0.007581085 |
| ACOT9                    | 1.910758996 | 0.000774517 |
| 4632428N05RIK            | 1.907776431 | 0.005147085 |
| ALDH1B1                  | 1.905290036 | 0.009923494 |
| A_55_P1970596            | 1.905197662 | 1.37E-05    |
| SLC15A3                  | 1.904836013 | 6.15E-07    |
| ENSMUST00000033486       | 1.904129822 | 0.001466487 |
| RRM2                     | 1.903341585 | 0.002188424 |
| VAV3                     | 1.901773492 | 0.053870316 |
| INCENP                   | 1.901683535 | 1.32E-07    |
| GALNT12                  | 1.899873682 | 0.003229661 |
| CHR9:78107225-78118850_F | 1.897897278 | 0.003229661 |
| STK10                    | 1.89178193  | 3.06E-09    |
| ADGRL4                   | 1.890925468 | 0.002188424 |

|                            |             |             |
|----------------------------|-------------|-------------|
| JDP2                       | 1.88122218  | 0.003669217 |
| TRPM6                      | 1.877572893 | 0.0734861   |
| NCAPD2                     | 1.877566278 | 3.84E-05    |
| BTBD11                     | 1.876669551 | 2.44E-09    |
| MYO1F                      | 1.876537946 | 0.000166554 |
| ARG2                       | 1.86885278  | 0.043182203 |
| GM13272                    | 1.868813562 | 0.0734861   |
| EFCAB9                     | 1.867676125 | 4.87E-10    |
| TMEM246                    | 1.86541251  | 0.007581085 |
| ASB11                      | 1.864669375 | 0.0734861   |
| EHD4                       | 1.861157025 | 0.024306258 |
| LMO1                       | 1.86108632  | 0.087334443 |
| GSTM3                      | 1.859017653 | 5.44E-06    |
| IL18BP                     | 1.85812884  | 1.77E-07    |
| CCND1                      | 1.857258085 | 0.005147085 |
| RCAN1                      | 1.854409841 | 6.76E-06    |
| CYBA                       | 1.847114476 | 1.37E-05    |
| ZWILCH                     | 1.846855544 | 0.023459349 |
| CDCA8                      | 1.844440848 | 0.024306258 |
| IGF2BP3                    | 1.840775469 | 0.023459349 |
| NAIP2                      | 1.837697657 | 2.44E-09    |
| OBOX8                      | 1.835239957 | 0.0734861   |
| NLN                        | 1.833373212 | 0.099516918 |
| SLC5A6                     | 1.828386046 | 0.007581085 |
| RHOC                       | 1.827707742 | 0.000107205 |
| CERK                       | 1.827577736 | 6.75E-05    |
| MGST3                      | 1.827259513 | 0.002188424 |
| CYP4F18                    | 1.824765137 | 0.000954713 |
| SLC11A1                    | 1.823751122 | 6.75E-06    |
| HEXIM1                     | 1.822242875 | 5.69E-06    |
| NCF1                       | 1.820134606 | 0.014937438 |
| KIFC5B                     | 1.819698284 | 0.029429781 |
| E230029C05RIK              | 1.807468382 | 0.001466487 |
| HMGB2                      | 1.807466149 | 1.20E-06    |
| TMEM240                    | 1.806716801 | 0.024306258 |
| MCM3                       | 1.804945179 | 0.005818331 |
| DMPK                       | 1.802340473 | 6.15E-07    |
| STK17B                     | 1.796780371 | 0.000954713 |
| CHR3:146645022-146646977_F | 1.796129052 | 0.099516918 |
| ID4                        | 1.79610855  | 0.0734861   |
| GM9292                     | 1.794569452 | 0.099516918 |
| TC1703829                  | 1.79077824  | 0.007581085 |
| LGMN                       | 1.787702704 | 5.44E-07    |
| GPR65                      | 1.786931458 | 0.0734861   |
| SLC25A24                   | 1.779863873 | 0.0734861   |
| IGH-VJ558                  | 1.778496747 | 0.099516918 |
| SLFN2                      | 1.77554654  | 0.029429781 |
| RGS2                       | 1.774647029 | 0.014937438 |
| P2RY6                      | 1.77436975  | 0.001466487 |

|                            |             |             |
|----------------------------|-------------|-------------|
| UNC5B                      | 1.773004383 | 0.003669217 |
| GZMC                       | 1.772449857 | 1.37E-05    |
| SELPLG                     | 1.771945144 | 1.71E-05    |
| NGFRAP1                    | 1.767167491 | 0.000774517 |
| COL4A1                     | 1.763388424 | 0.000167342 |
| ITGAX                      | 1.757531073 | 0.043182203 |
| HMGCR                      | 1.755655096 | 0.037937888 |
| LIMD2                      | 1.7541665   | 5.44E-07    |
| PLSCR1                     | 1.751436417 | 0.014937438 |
| 4933421107RIK              | 1.74897612  | 0.000167342 |
| A_55_P2093770              | 1.748784204 | 0.028990591 |
| CLEC1B                     | 1.744003775 | 0.000954713 |
| SLC25A4                    | 1.743228583 | 0.005147085 |
| 1810011O10RIK              | 1.74050435  | 0.002188424 |
| ACTA2                      | 1.736570298 | 0.043182203 |
| ITPR3                      | 1.7317125   | 1.71E-05    |
| PTGR1                      | 1.715605723 | 0.002188424 |
| SMIM22                     | 1.715533331 | 0.000189142 |
| BC030867                   | 1.711134571 | 0.059268219 |
| ARHGAP9                    | 1.706346787 | 3.24E-07    |
| CLEC7A                     | 1.70546921  | 0.005818331 |
| RIPK3                      | 1.704888253 | 0.000107205 |
| C1QA                       | 1.704655911 | 0.000107205 |
| ALOX5AP                    | 1.702608924 | 1.37E-05    |
| MS4A6C                     | 1.700017264 | 0.007581085 |
| EAR10                      | 1.697538919 | 0.000506785 |
| AF251705                   | 1.697450593 | 0.000107205 |
| AKR1B8                     | 1.696527005 | 0.029429781 |
| CHR3:146629425-146649125_F | 1.695523256 | 0.005147085 |
| SRGN                       | 1.69488308  | 0.002188424 |
| HIST1H2AB                  | 1.694816315 | 0.005818331 |
| SCIMP                      | 1.694232856 | 6.75E-05    |
| ELL3                       | 1.693514265 | 0.023459349 |
| TUBB6                      | 1.690673341 | 5.44E-07    |
| TTK                        | 1.685508494 | 0.059268219 |
| EBI3                       | 1.68123825  | 2.93E-07    |
| CD9                        | 1.67984899  | 3.73E-05    |
| ENSMUST00000110087         | 1.677204304 | 0.037937888 |
| THEM6                      | 1.675583586 | 0.099516918 |
| RNASE2A                    | 1.674560725 | 0.000226234 |
| GM7480                     | 1.674247325 | 0.0734861   |
| ORM1                       | 1.673169342 | 0.059268219 |
| SLC25A12                   | 1.672923492 | 0.024306258 |
| TNFAIP8L2                  | 1.672668698 | 0.012257839 |
| PITPNM1                    | 1.671508995 | 0.000954713 |
| ENSMUST00000118061         | 1.670856947 | 0.001324416 |
| CD48                       | 1.670419445 | 1.71E-05    |
| HIST1H1B                   | 1.669297844 | 0.005818331 |
| GNG2                       | 1.668879196 | 0.000954713 |



|                           |             |             |
|---------------------------|-------------|-------------|
| HTR1D                     | 1.667817124 | 7.50E-05    |
| AI429363                  | 1.66657864  | 0.002188424 |
| MAP4K4                    | 1.664129418 | 1.77E-07    |
| 1700024P16RIK             | 1.661510302 | 0.011102126 |
| KIF21B                    | 1.653918907 | 0.005147085 |
| EAR12                     | 1.651625285 | 0.002188424 |
| INPP5D                    | 1.648096795 | 1.71E-05    |
| PIRB                      | 1.639279194 | 0.008029527 |
| TNFAIP8                   | 1.637395283 | 0.023459349 |
| PROCR                     | 1.636093223 | 0.059268219 |
| MFSD7A                    | 1.635846138 | 0.005818331 |
| OLFML3                    | 1.635695302 | 0.005818331 |
| APAF1                     | 1.634565689 | 0.003669217 |
| EAR2                      | 1.630587939 | 0.003669217 |
| TSPAN6                    | 1.628591958 | 0.0734861   |
| CD68                      | 1.624909437 | 6.75E-05    |
| EVI2A                     | 1.621337631 | 0.000506785 |
| SLC4A8                    | 1.618791055 | 0.024803337 |
| MMP7                      | 1.617007932 | 0.000189142 |
| GMPR                      | 1.615291841 | 0.043182203 |
| PIF1                      | 1.612916975 | 0.005818331 |
| FAM102B                   | 1.612662194 | 0.001466487 |
| SULT2B1                   | 1.61164897  | 0.0734861   |
| HIP1                      | 1.60425018  | 0.099516918 |
| LBH                       | 1.604249713 | 0.004840579 |
| THEMIS2                   | 1.603258305 | 0.009923494 |
| PRMT2                     | 1.602641935 | 0.011102126 |
| HIST1H2AO                 | 1.600204175 | 0.099516918 |
| PCDH17                    | 1.597815431 | 0.000774517 |
| CHR17:12990484-13018375_R | 1.59769806  | 0.089012317 |
| AK7                       | 1.597541526 | 0.0734861   |
| KCNK6                     | 1.593720086 | 0.000166554 |
| HIST1H2AN                 | 1.590515454 | 0.009923494 |
| EMP3                      | 1.59039437  | 0.014937438 |
| ENSMUST00000093911        | 1.589731403 | 0.024306258 |
| ARMCX4                    | 1.587019989 | 0.000774517 |
| IL17RB                    | 1.583799238 | 7.10E-05    |
| LY86                      | 1.580465899 | 6.75E-05    |
| FILIP1L                   | 1.575596776 | 0.000167342 |
| GM5640                    | 1.575501842 | 0.005147085 |
| PIK3CD                    | 1.57311208  | 0.003229661 |
| AKR1B10                   | 1.573085365 | 6.76E-06    |
| P2RY12                    | 1.567058881 | 0.099516918 |
| UST                       | 1.564011401 | 0.023459349 |
| IFI30                     | 1.561488645 | 0.000346571 |
| CLEC10A                   | 1.56127431  | 0.099516918 |
| CSTB                      | 1.561018112 | 0.000954713 |
| LYL1                      | 1.559512621 | 0.012257839 |
| HAUS8                     | 1.559031333 | 0.0734861   |

|                            |             |             |
|----------------------------|-------------|-------------|
| PEA15A                     | 1.555659226 | 0.000954713 |
| PARVG                      | 1.555073158 | 0.005818331 |
| COL1A2                     | 1.5524121   | 0.004640056 |
| AOC1                       | 1.551824344 | 0.003229661 |
| HIST1H2AG                  | 1.551696565 | 0.053870316 |
| FCGR4                      | 1.55047245  | 2.68E-05    |
| CORO2A                     | 1.54788136  | 0.014937438 |
| GM10791                    | 1.546119111 | 0.099516918 |
| ENSMUST00000169692         | 1.53883719  | 0.024306258 |
| AKAP3                      | 1.538215661 | 0.000506785 |
| ECSCR                      | 1.538074638 | 0.002188424 |
| SYNE4                      | 1.537441003 | 0.043182203 |
| SYCE2                      | 1.53683133  | 0.043182203 |
| CYTH4                      | 1.536529385 | 0.002188424 |
| A_55_P2071846              | 1.535950239 | 0.002188424 |
| FPR1                       | 1.535679989 | 0.000107205 |
| ARHGAP44                   | 1.532803698 | 0.001466487 |
| SGCE                       | 1.527873253 | 0.000189142 |
| PKM                        | 1.526685351 | 0.008029527 |
| HECW2                      | 1.520788055 | 0.024306258 |
| GM10277                    | 1.518957663 | 0.009923494 |
| FKBP10                     | 1.518656861 | 0.014937438 |
| CXCL10                     | 1.517942414 | 0.043182203 |
| MBD4                       | 1.51702753  | 0.011102126 |
| SH3BGRL3                   | 1.515850303 | 0.002188424 |
| ITM2C                      | 1.514009751 | 0.005147085 |
| C1QC                       | 1.51394394  | 1.71E-05    |
| CALHM2                     | 1.513046173 | 5.44E-06    |
| ETS2                       | 1.508735392 | 1.37E-05    |
| SPAG5                      | 1.507852211 | 0.014937438 |
| LAMA5                      | 1.506188522 | 7.10E-05    |
| SSBP4                      | 1.505530483 | 0.002188424 |
| MYL12A                     | 1.505396975 | 0.024306258 |
| DDAH1                      | 1.504267489 | 0.003669217 |
| TSPAN13                    | 1.50299822  | 0.011102126 |
| PLXDC2                     | 1.501863994 | 0.059268219 |
| MPEG1                      | 1.500480031 | 0.007581085 |
| CLEC4A1                    | 1.500062381 | 0.004840579 |
| GDPD1                      | 1.499706842 | 0.003669217 |
| RRM1                       | 1.496413676 | 0.00216544  |
| HUNK                       | 1.492265889 | 0.014937438 |
| CLIP2                      | 1.4905006   | 0.023459349 |
| 4933403J19RIK              | 1.488919063 | 0.0734861   |
| PLD4                       | 1.487706334 | 6.75E-05    |
| CHR6:116123643-116124550_F | 1.487259534 | 0.0734861   |
| RHBDF1                     | 1.485270523 | 0.014937438 |
| CKB                        | 1.484150064 | 0.000954713 |
| PPAP2C                     | 1.48207281  | 0.005818331 |
| VAT1                       | 1.47953232  | 0.005147085 |

|                            |             |             |
|----------------------------|-------------|-------------|
| EFCAB10                    | 1.479467899 | 0.089012317 |
| MOB3A                      | 1.478690425 | 0.099516918 |
| TTC39A                     | 1.477948376 | 0.029429781 |
| GLIS2                      | 1.475857787 | 0.001466487 |
| GUSB                       | 1.475840868 | 0.003229661 |
| AU015723                   | 1.474519037 | 0.014937438 |
| RASGRP1                    | 1.472775001 | 0.059268219 |
| ARHGAP25                   | 1.472317995 | 0.002188424 |
| CTSC                       | 1.472051801 | 0.043182203 |
| NAMPT                      | 1.470683452 | 0.003669217 |
| MMGT2                      | 1.470321261 | 0.004840579 |
| E2F1                       | 1.466824367 | 7.10E-05    |
| RFTN1                      | 1.466778821 | 0.028990591 |
| CD300E                     | 1.465323349 | 0.059268219 |
| EPPK1                      | 1.464443829 | 0.014937438 |
| CHR1:175653557-175671940_R | 1.46210798  | 0.000506785 |
| TMEM41A                    | 1.459525075 | 0.005818331 |
| TLR4                       | 1.459306562 | 0.004840579 |
| FEN1                       | 1.458864755 | 0.024306258 |
| PIRA2                      | 1.457077034 | 0.037937888 |
| ENSMUST00000195502         | 1.456279327 | 0.0734861   |
| SIRPA                      | 1.456091059 | 0.000167342 |
| 2700094K13RIK              | 1.456016274 | 0.099516918 |
| PCNA                       | 1.446851596 | 0.043182203 |
| MATN2                      | 1.445221219 | 0.0734861   |
| LXN                        | 1.444514956 | 0.005147085 |
| VIM                        | 1.444391449 | 0.014937438 |
| HACD4                      | 1.44438037  | 0.000954713 |
| GPR137B                    | 1.443865438 | 0.009923494 |
| FCGR2B                     | 1.44362754  | 0.011102126 |
| RBL1                       | 1.439341719 | 0.005818331 |
| CHST11                     | 1.438743127 | 0.059268219 |
| CHR1:175654606-175672031_R | 1.438240135 | 8.57E-06    |
| AXL                        | 1.437110478 | 0.000506785 |
| PLEK                       | 1.435541848 | 0.029429781 |
| IGSF9                      | 1.434626606 | 0.005818331 |
| PLEKHB2                    | 1.431689987 | 0.099516918 |
| RASGEF1B                   | 1.431578546 | 0.043182203 |
| SULT1A1                    | 1.430239061 | 0.002188424 |
| PRELID2                    | 1.427345877 | 0.024306258 |
| TAX1BP3                    | 1.42662508  | 0.001324416 |
| RNF32                      | 1.424058333 | 0.037937888 |
| PTPRC                      | 1.422998988 | 0.000954713 |
| FAM174B                    | 1.421514758 | 0.009923494 |
| FCER1G                     | 1.418943193 | 0.012257839 |
| GM14446                    | 1.418024647 | 6.75E-05    |
| LIG1                       | 1.415503962 | 0.003229661 |
| MEST                       | 1.413745921 | 0.099516918 |
| LSP1                       | 1.412438602 | 0.011102126 |

|                          |             |             |
|--------------------------|-------------|-------------|
| NCKAP1L                  | 1.411757915 | 0.000346571 |
| LOX                      | 1.40916765  | 0.024306258 |
| CCL24                    | 1.408996678 | 0.059268219 |
| A_55_P2036932            | 1.407184735 | 0.028990591 |
| CIB3                     | 1.406826312 | 0.099516918 |
| 5730508B09RIK            | 1.40617262  | 0.079872805 |
| BATF                     | 1.402589728 | 0.099516918 |
| GADD45B                  | 1.400971008 | 0.0734861   |
| BC028528                 | 1.399434905 | 0.000954713 |
| FSTL1                    | 1.397796455 | 0.001466487 |
| TRIM47                   | 1.391136801 | 0.002188424 |
| A_55_P2032912            | 1.390405586 | 0.028990591 |
| HPCAL1                   | 1.386904631 | 0.000189142 |
| LOXL2                    | 1.384244255 | 0.099516918 |
| PRRX1                    | 1.38321652  | 0.059268219 |
| GATA6                    | 1.382799092 | 0.043182203 |
| ENSMUST00000153890       | 1.382143011 | 0.014937438 |
| A_55_P2170105            | 1.381956396 | 0.0734861   |
| NFKBID                   | 1.381031878 | 0.059268219 |
| ALDH3B1                  | 1.381015617 | 0.000954713 |
| CHRX:98989930-98994344_F | 1.380682255 | 0.000954713 |
| OXCT1                    | 1.380575466 | 0.005147085 |
| RAC2                     | 1.380024408 | 0.024306258 |
| CCDC88B                  | 1.379717306 | 0.029429781 |
| GIT2                     | 1.374364923 | 0.099516918 |
| NFKBIE                   | 1.366025145 | 0.024306258 |
| TGFBI                    | 1.365342815 | 0.001538172 |
| CSRP1                    | 1.364180493 | 0.009923494 |
| WIPF3                    | 1.362528889 | 0.002188424 |
| NRROS                    | 1.362064022 | 3.73E-05    |
| ADAP1                    | 1.361501379 | 0.000954713 |
| LPXN                     | 1.360637136 | 0.089012317 |
| KCNU1                    | 1.357957332 | 0.053870316 |
| HPSE                     | 1.356121768 | 0.005818331 |
| MPZL1                    | 1.354595127 | 0.007581085 |
| APBB1IP                  | 1.353781703 | 0.002188424 |
| IGSF6                    | 1.353084205 | 0.002188424 |
| ADAM23                   | 1.350778677 | 0.014937438 |
| A_55_P2144126            | 1.348899179 | 0.007581085 |
| MYLIP                    | 1.34804234  | 0.000506785 |
| GIMAP5                   | 1.347815236 | 0.003229661 |
| IFI204                   | 1.346615188 | 0.000346571 |
| MARCKS                   | 1.346245838 | 0.002188424 |
| COL6A3                   | 1.34467492  | 0.099516918 |
| LAIR1                    | 1.34190092  | 0.002188424 |
| GNGT2                    | 1.339888764 | 0.023459349 |
| RAB8B                    | 1.33949339  | 0.014937438 |
| IL10RA                   | 1.339113816 | 0.002188424 |
| SEMA6D                   | 1.337583704 | 0.053870316 |

|                    |             |             |
|--------------------|-------------|-------------|
| DBNL               | 1.335358811 | 0.043182203 |
| PLCG2              | 1.333460585 | 0.002188424 |
| HCK                | 1.331107314 | 0.003669217 |
| KRTAP9-3           | 1.328513716 | 0.059268219 |
| MAN1C1             | 1.325963954 | 0.009923494 |
| CCL9               | 1.325803017 | 0.011102126 |
| TLR1               | 1.323863672 | 0.0734861   |
| PDGFA              | 1.323185419 | 0.043182203 |
| REM2               | 1.322131738 | 0.099516918 |
| GAS2L3             | 1.321756039 | 0.024306258 |
| TGFBR2             | 1.321543879 | 0.001538172 |
| FLNA               | 1.32142193  | 0.007581085 |
| CTBP2              | 1.321303386 | 0.024306258 |
| IFI205             | 1.318069717 | 0.024306258 |
| CASP4              | 1.317360218 | 0.049978137 |
| FOXD2OS            | 1.313272783 | 0.002188424 |
| DEGS1              | 1.312872133 | 0.001466487 |
| ADCY7              | 1.311565477 | 3.84E-05    |
| COL4A2             | 1.30959008  | 0.009923494 |
| CYP4F16            | 1.307444702 | 0.043182203 |
| TLR13              | 1.306779444 | 0.024306258 |
| STEAP2             | 1.306125114 | 0.099516918 |
| KCTD12             | 1.300811298 | 0.037937888 |
| A_55_P2040810      | 1.299158748 | 0.079872805 |
| RUNDC3B            | 1.298903226 | 0.024306258 |
| ADCK4              | 1.29719326  | 0.000774517 |
| ENSMUST00000091117 | 1.296371333 | 0.005818331 |
| WAS                | 1.289849798 | 0.002188424 |
| TMSB10             | 1.28871503  | 0.037937888 |
| SLC43A2            | 1.286729369 | 0.000107205 |
| TUBA8              | 1.285518578 | 0.052789646 |
| TMSB4X             | 1.284228922 | 0.023459349 |
| TC1682680          | 1.283330453 | 0.037937888 |
| LAPTM5             | 1.281336644 | 0.029429781 |
| CCNJL              | 1.27921795  | 0.0734861   |
| NCK2               | 1.277366159 | 0.000954713 |
| ABLIM1             | 1.276439083 | 0.0734861   |
| COL5A1             | 1.276069287 | 0.002188424 |
| FCNA               | 1.275539358 | 0.0734861   |
| ARHGAP18           | 1.273584194 | 0.079872805 |
| SPCS1              | 1.271153829 | 0.099516918 |
| HCLS1              | 1.270124578 | 0.004840579 |
| SHISA5             | 1.265605483 | 0.059268219 |
| IQGAP1             | 1.254519769 | 0.000506785 |
| PDLIM4             | 1.25290363  | 0.009923494 |
| DOCK11             | 1.252482963 | 0.024306258 |
| ARF6               | 1.250301202 | 0.007581085 |
| HIST1H1A           | 1.247997475 | 0.029429781 |
| MAT1A              | 1.243517491 | 0.005818331 |

|                    |             |             |
|--------------------|-------------|-------------|
| CD52               | 1.241606867 | 0.0734861   |
| PTPN18             | 1.241313899 | 0.023459349 |
| SNRPB              | 1.239392853 | 0.024306258 |
| CRIP2              | 1.239007751 | 0.000107205 |
| LRRC25             | 1.238898592 | 0.001324416 |
| PCBP3              | 1.238056383 | 0.005818331 |
| CTSK               | 1.236972778 | 0.052789646 |
| SCAMP5             | 1.236172093 | 0.014937438 |
| A_55_P1975843      | 1.235947776 | 0.059268219 |
| PPIC               | 1.23505509  | 0.007581085 |
| IFIT2              | 1.233711616 | 0.000162979 |
| KANK3              | 1.232275384 | 0.029429781 |
| NUP93              | 1.225725019 | 0.014937438 |
| MUC4               | 1.223727674 | 0.099516918 |
| FGR                | 1.223430155 | 0.043182203 |
| HK3                | 1.222807934 | 0.000774517 |
| YWHAH              | 1.222379889 | 0.005818331 |
| DOK2               | 1.219200533 | 0.012257839 |
| FABP4              | 1.218556279 | 0.08222578  |
| PGK1               | 1.217288726 | 0.0734861   |
| ARHGAP31           | 1.216954214 | 0.000954713 |
| GM5643             | 1.216776956 | 0.043182203 |
| TFPI               | 1.216258204 | 0.0734861   |
| FES                | 1.215853865 | 0.099516918 |
| ENSMUST00000155076 | 1.214388269 | 0.000346571 |
| AI607873           | 1.211828423 | 0.043182203 |
| EVL                | 1.210585771 | 0.043182203 |
| NFAM1              | 1.209921235 | 0.005818331 |
| SDC1               | 1.209717284 | 0.0734861   |
| RGS10              | 1.208961328 | 0.059268219 |
| SDPR               | 1.205065011 | 0.024306258 |
| NPC2               | 1.204774545 | 0.059268219 |
| 2210013O21RIK      | 1.204659915 | 0.002188424 |
| MAPK3              | 1.203777767 | 0.001466487 |
| IRF8               | 1.19900585  | 0.003669217 |
| AJAP1              | 1.197521556 | 0.099516918 |
| ITGB2              | 1.196566353 | 0.089012317 |
| APOC2              | 1.196503332 | 0.002188424 |
| SNX20              | 1.195132916 | 0.024306258 |
| RCN1               | 1.191525015 | 0.043182203 |
| PCDHB6             | 1.190785671 | 0.005147085 |
| KRT18              | 1.190322929 | 0.043182203 |
| PAQR4              | 1.190112703 | 0.037937888 |
| TPI1               | 1.18954168  | 0.005818331 |
| C5AR2              | 1.188567157 | 0.089012317 |
| RIPK4              | 1.188301049 | 0.004640056 |
| ENSMUST00000155820 | 1.187731877 | 0.007581085 |
| A_55_P2075000      | 1.18699201  | 0.029429781 |
| SLC7A8             | 1.185100696 | 0.043182203 |



|                            |             |             |
|----------------------------|-------------|-------------|
| TYMS-PS                    | 1.181782521 | 0.059268219 |
| MYO1G                      | 1.180747858 | 0.014937438 |
| NAP111445-1                | 1.179973657 | 0.007581085 |
| TSPAN17                    | 1.179902522 | 0.014937438 |
| TUBB4A                     | 1.176785841 | 0.029429781 |
| TIE1                       | 1.176606404 | 0.099516918 |
| HCST                       | 1.176226744 | 0.079872805 |
| CHR4:136856064-136877219_R | 1.173400165 | 0.024306258 |
| SMC4                       | 1.172914335 | 0.005818331 |
| BC030479                   | 1.171947767 | 0.029429781 |
| FLT4                       | 1.169936253 | 0.009923494 |
| AIFM2                      | 1.168886504 | 0.099516918 |
| CSF2RA                     | 1.165507753 | 0.028990591 |
| A_55_P2112302              | 1.164406618 | 0.005818331 |
| SLC25A48                   | 1.163896327 | 0.059268219 |
| FAM129A                    | 1.161384183 | 0.043182203 |
| PDLIM1                     | 1.159942444 | 0.053870316 |
| PIGP                       | 1.15777819  | 0.0734861   |
| ANK3                       | 1.156786935 | 0.079872805 |
| VCPKMT                     | 1.155105894 | 0.007581085 |
| NAAA                       | 1.154357795 | 0.043182203 |
| RARG                       | 1.152267696 | 0.099516918 |
| CLCA3A1                    | 1.152180427 | 0.002188424 |
| CHRX:50407969-50410370_R   | 1.147428564 | 0.014937438 |
| KIFC3                      | 1.145783555 | 0.079872805 |
| RDH5                       | 1.142007346 | 0.014937438 |
| ATP6V0E                    | 1.141490493 | 0.059268219 |
| SOX4                       | 1.139588738 | 0.015085602 |
| MRC1                       | 1.138651938 | 0.059268219 |
| ADAM15                     | 1.137710105 | 0.099516918 |
| VSIG4                      | 1.137678972 | 0.0734861   |
| PDLIM2                     | 1.137224191 | 0.089012317 |
| CHR8:119739165-119739905_F | 1.133001437 | 0.0734861   |
| KLF2                       | 1.130396241 | 0.099516918 |
| HIST1H2AK                  | 1.129852911 | 0.024306258 |
| TM6SF1                     | 1.126130126 | 0.024306258 |
| FANCD2                     | 1.12399299  | 0.099516918 |
| DPYSL2                     | 1.123365197 | 0.005818331 |
| PCOLCE                     | 1.121930287 | 0.099516918 |
| DENND3                     | 1.121874386 | 0.007581085 |
| NUDT19                     | 1.121843412 | 0.009923494 |
| PRKCA                      | 1.120510616 | 0.015085602 |
| MCL1                       | 1.115832219 | 0.012257839 |
| ARHGEF16                   | 1.115004364 | 0.00216544  |
| KPNA2                      | 1.114960506 | 0.005818331 |
| AW011956                   | 1.113953515 | 0.005818331 |
| ABI3                       | 1.112316276 | 0.043182203 |
| RNF169                     | 1.112284796 | 0.0734861   |
| GDE1                       | 1.112128451 | 0.099516918 |

|                           |             |             |
|---------------------------|-------------|-------------|
| POLD1                     | 1.109883471 | 0.037937888 |
| GM4120                    | 1.104073205 | 0.005818331 |
| CAV2                      | 1.104002851 | 0.043182203 |
| CNN2                      | 1.102042544 | 0.0734861   |
| C030046G05                | 1.101455572 | 0.037937888 |
| TMEM165                   | 1.101210961 | 0.059268219 |
| COL4A5                    | 1.101189795 | 0.079872805 |
| HIST2H3B                  | 1.100668861 | 0.037937888 |
| SIVA1                     | 1.097391364 | 0.007581085 |
| TEAD2                     | 1.0971577   | 0.059268219 |
| POC1A                     | 1.096390272 | 0.029429781 |
| ENSMUST00000172583        | 1.094851044 | 0.043182203 |
| BQ042754                  | 1.09378655  | 0.004640056 |
| ARPC1B                    | 1.089132773 | 0.0734861   |
| CPM                       | 1.086539072 | 0.059268219 |
| POR                       | 1.085874089 | 0.043182203 |
| FAM111A                   | 1.083782572 | 0.043182203 |
| HIST2H2BB                 | 1.083724155 | 0.024306258 |
| PFKL                      | 1.082426502 | 0.024306258 |
| FPR2                      | 1.080366922 | 0.059268219 |
| HDAC7                     | 1.080353878 | 0.099516918 |
| MYO1D                     | 1.079235952 | 0.099516918 |
| BTNL9                     | 1.078241365 | 0.023459349 |
| LARGE                     | 1.077550509 | 0.079872805 |
| F11R                      | 1.076535669 | 0.043182203 |
| FANCB                     | 1.075997398 | 0.029429781 |
| VAR5                      | 1.07593971  | 0.079872805 |
| MAP3K1                    | 1.074745552 | 0.014937438 |
| P2RY13                    | 1.066582012 | 0.0734861   |
| ADD3                      | 1.065155445 | 0.053870316 |
| RRAS                      | 1.0641195   | 0.043182203 |
| CHR16:34524589-34573439_R | 1.063871582 | 0.099516918 |
| TUBA1B                    | 1.062086613 | 0.004840579 |
| MORC3                     | 1.061641417 | 0.0734861   |
| ATP7A                     | 1.061016511 | 0.005818331 |
| CHR9:34195675-34196336_R  | 1.060662591 | 0.029429781 |
| NAP096950-001             | 1.059772656 | 0.002188424 |
| A_55_P2067483             | 1.053832367 | 0.037937888 |
| IDH2                      | 1.050184935 | 0.023459349 |
| VOPP1                     | 1.049388658 | 0.003669217 |
| TMEM54                    | 1.04895819  | 0.005147085 |
| PYCARD                    | 1.048543886 | 0.037937888 |
| AKR1B3                    | 1.045848862 | 0.014937438 |
| FRY                       | 1.045508926 | 0.0734861   |
| TMEM120A                  | 1.044075428 | 0.0734861   |
| PDLIM7                    | 1.042872283 | 0.0734861   |
| CTSD                      | 1.042696288 | 0.005818331 |
| WDR1                      | 1.041914685 | 0.031528574 |
| NAP102538-1               | 1.038601595 | 0.037937888 |

|                     |             |             |
|---------------------|-------------|-------------|
| HEXA                | 1.033694472 | 0.099516918 |
| CCDC102A            | 1.030840179 | 0.029429781 |
| ENSMUST00000019386  | 1.029372063 | 0.011102126 |
| SLC1A5              | 1.024514605 | 0.003229661 |
| RAB19               | 1.021950294 | 0.003229661 |
| TONSL               | 1.016230778 | 0.099516918 |
| TMEM132A            | 1.015648615 | 0.049978137 |
| CDC42EP5            | 1.014981682 | 0.0734861   |
| SAMM50              | 1.013730678 | 0.037937888 |
| SNX12               | 1.012120535 | 0.024306258 |
| ILF3                | 1.010048615 | 0.0734861   |
| WWTR1               | 1.009861007 | 0.0734861   |
| MIS18A              | 1.006911835 | 0.037937888 |
| TGFB1               | 1.006877153 | 0.029429781 |
| SLAMF9              | 1.004560788 | 0.099516918 |
| MAPK7               | 1.003138254 | 0.043182203 |
| H2AFX               | 0.999053844 | 0.0734861   |
| G2E3                | 0.998894187 | 0.099516918 |
| CDKN2D              | 0.992365693 | 0.059268219 |
| SEMA4B              | 0.991360702 | 0.024306258 |
| HSPG2               | 0.991099645 | 0.007581085 |
| ARHGEF6             | 0.990092873 | 0.059268219 |
| A_55_P2013591       | 0.988489354 | 0.079872805 |
| CRTAP               | 0.988369674 | 0.037937888 |
| FYB                 | 0.985552492 | 0.052789646 |
| NCF2                | 0.985116159 | 0.099516918 |
| RALGDS              | 0.982851305 | 0.011102126 |
| MVB12B              | 0.978261984 | 0.029429781 |
| SOX18               | 0.978091538 | 0.079872805 |
| GNB1                | 0.975514867 | 0.011102126 |
| SMPDL3A             | 0.974359196 | 0.024306258 |
| MARCKSL1            | 0.972043358 | 0.029429781 |
| CSF1R               | 0.969373255 | 0.053870316 |
| GTF2E2              | 0.968474903 | 0.059268219 |
| ENSMUST000000181978 | 0.967115392 | 0.053870316 |
| ARHGEF2             | 0.96473494  | 0.053870316 |
| PRKAR1B             | 0.9535829   | 0.099516918 |
| TC1615277           | 0.953483802 | 0.099516918 |
| PYHIN1              | 0.952996272 | 0.049978137 |
| HEXB                | 0.949823911 | 0.099516918 |
| CALM2               | 0.949363373 | 0.014937438 |
| EHBP1L1             | 0.949271539 | 0.059268219 |
| SFXN1               | 0.949106721 | 0.005818331 |
| USP12               | 0.948569133 | 0.043182203 |
| HRH1                | 0.948183016 | 0.0734861   |
| A_55_P1995151       | 0.946119423 | 0.079872805 |
| ENSMUST00000044113  | 0.946093011 | 0.029429781 |
| COLGALT1            | 0.945877455 | 0.089012317 |
| ATPIF1              | 0.943333182 | 0.0734861   |

|                    |             |             |
|--------------------|-------------|-------------|
| MKRN2OS            | 0.939128462 | 0.024306258 |
| STARD10            | 0.937443151 | 0.059268219 |
| ITIH3              | 0.93271268  | 0.0734861   |
| YKT6               | 0.932506377 | 0.099516918 |
| PLA2G15            | 0.931241418 | 0.0734861   |
| MAGEF1             | 0.929944907 | 0.079872805 |
| ITGA7              | 0.929788871 | 0.0734861   |
| RAB3IL1            | 0.929624809 | 0.099516918 |
| A_55_P2029021      | 0.929059293 | 0.024306258 |
| ENSMUST00000182630 | 0.928552055 | 0.0734861   |
| ENKD1              | 0.922473849 | 0.029429781 |
| ENSMUST00000181990 | 0.920000856 | 0.099516918 |
| CDC42SE1           | 0.91160615  | 0.059268219 |
| A_55_P2108424      | 0.910059396 | 0.099516918 |
| UNC13B             | 0.909376101 | 0.099516918 |
| SLC15A4            | 0.906192027 | 0.099516918 |
| TM4SF1             | 0.899023548 | 0.0734861   |
| EFTUD2             | 0.891708959 | 0.0734861   |
| TSPO               | 0.890264736 | 0.037937888 |
| EMP2               | 0.887695229 | 0.0734861   |
| GPX4               | 0.885927671 | 0.0734861   |
| A930028N01RIK      | 0.879633198 | 0.099516918 |
| A_55_P2153141      | 0.879292566 | 0.0734861   |
| SLBP               | 0.879236483 | 0.043182203 |
| SCARB1             | 0.875665435 | 0.099516918 |
| TNIP1              | 0.874481936 | 0.099516918 |
| UPP1               | 0.874264306 | 0.053870316 |
| F2R                | 0.862581484 | 0.037937888 |
| CORO1C             | 0.862417008 | 0.059268219 |
| ENSMUST00000122262 | 0.861668141 | 0.099516918 |
| CD99               | 0.860830633 | 0.0734861   |
| MYL12B             | 0.859884072 | 0.099516918 |
| LEPROT             | 0.846460043 | 0.053870316 |
| RASA3              | 0.844646747 | 0.089012317 |
| BCKDHB             | 0.842811174 | 0.037937888 |
| A_55_P2072908      | 0.841065127 | 0.079872805 |
| RANGAP1            | 0.838795528 | 0.099516918 |
| ENSMUST00000067230 | 0.837008115 | 0.099516918 |
| PGAM1              | 0.819396908 | 0.099516918 |
| PYCR2              | 0.818495577 | 0.053870316 |
| CTSB               | 0.814065532 | 0.099516918 |
| CASP2              | 0.812082612 | 0.099516918 |
| 2810025M15RIK      | 0.79732462  | 0.0734861   |
| ENO1B              | 0.796050435 | 0.0734861   |
| ADAMTS2            | 0.793025174 | 0.0734861   |
| CXCL16             | 0.779078519 | 0.099516918 |
| A_55_P1963878      | 0.778911999 | 0.099516918 |
| RAP1GAP            | 0.77829128  | 0.099516918 |
| INPP5A             | 0.772764088 | 0.099516918 |

|                           |              |             |
|---------------------------|--------------|-------------|
| ATP11C                    | -0.734370962 | 0.099516918 |
| NR3C1                     | -0.741071277 | 0.099516918 |
| SCAF1                     | -0.777483758 | 0.08222578  |
| CHR1:45066850-45095650_R  | -0.789596549 | 0.099516918 |
| NANP                      | -0.791336466 | 0.0734861   |
| ARL5B                     | -0.804703013 | 0.099516918 |
| MAU2                      | -0.812274334 | 0.099516918 |
| TMEM220                   | -0.815890663 | 0.099516918 |
| ZFP110                    | -0.820299486 | 0.059268219 |
| TPGS1                     | -0.821327654 | 0.099516918 |
| MXD4                      | -0.824900339 | 0.0734861   |
| GM15517                   | -0.82840673  | 0.0734861   |
| SARS                      | -0.830805522 | 0.089012317 |
| NOG                       | -0.836295015 | 0.08222578  |
| BTD                       | -0.837256181 | 0.099516918 |
| CPOX                      | -0.84838691  | 0.099516918 |
| ENSMUST00000118343        | -0.849675239 | 0.087334443 |
| 2310010J17RIK             | -0.851340893 | 0.099516918 |
| CHMP7                     | -0.852217039 | 0.059268219 |
| UBL7                      | -0.85263828  | 0.099516918 |
| ZFP62                     | -0.853446907 | 0.079872805 |
| A_55_P2128042             | -0.855883408 | 0.099516918 |
| CHR8:27129927-27137444_R  | -0.85650172  | 0.099516918 |
| RIBC1                     | -0.857335888 | 0.043182203 |
| TC1630414                 | -0.857658144 | 0.059268219 |
| FERMT2                    | -0.862585771 | 0.059268219 |
| UQCC3                     | -0.867700805 | 0.08222578  |
| CHR18:32389815-32392082_F | -0.868366745 | 0.099516918 |
| VMN1R48                   | -0.871175936 | 0.087334443 |
| A_55_P2114034             | -0.87467089  | 0.0734861   |
| AW111846                  | -0.876422996 | 0.059268219 |
| GM29735                   | -0.878193252 | 0.099516918 |
| CLPP                      | -0.878402679 | 0.023459349 |
| ENSMUST00000051301        | -0.878881248 | 0.0734861   |
| LHFPL4                    | -0.88326082  | 0.0734861   |
| TRP53INP2                 | -0.887697144 | 0.089012317 |
| DICER1                    | -0.888844284 | 0.079872805 |
| CHR16:43623175-43624069_F | -0.893172533 | 0.079872805 |
| CHR14:33895294-33923644_F | -0.897525766 | 0.0734861   |
| TRIP4                     | -0.898516551 | 0.029429781 |
| C8A                       | -0.900000694 | 0.0734861   |
| GM14432                   | -0.900028484 | 0.059268219 |
| TC1639827                 | -0.900586524 | 0.0734861   |
| NRSN2                     | -0.904226064 | 0.099516918 |
| FBXO36                    | -0.905095525 | 0.024306258 |
| CD3E                      | -0.905481551 | 0.0734861   |
| 1500012F01RIK             | -0.914382543 | 0.029429781 |
| ACPP                      | -0.915879811 | 0.099516918 |
| SLC33A1                   | -0.91653669  | 0.011102126 |

|                             |              |             |
|-----------------------------|--------------|-------------|
| CAPN11                      | -0.916970798 | 0.024306258 |
| WRAP73                      | -0.918738246 | 0.014937438 |
| ARHGAP26                    | -0.919914822 | 0.0734861   |
| PDF                         | -0.920797069 | 0.024306258 |
| A_55_P2032849               | -0.921409641 | 0.005818331 |
| CHR10:87541696-87547421_R   | -0.923225353 | 0.043182203 |
| PEX11A                      | -0.923653321 | 0.0734861   |
| DCDC2B                      | -0.925984204 | 0.014937438 |
| MOCS1                       | -0.92657884  | 0.099516918 |
| FAM188A                     | -0.926625521 | 0.029429781 |
| GJB1                        | -0.928802449 | 0.0734861   |
| TPRKB                       | -0.9295728   | 0.059268219 |
| TSACC                       | -0.930299617 | 0.024306258 |
| 1700019O17RIK               | -0.931335601 | 0.024306258 |
| CHR3:9401052-9415202_R      | -0.932581262 | 0.079872805 |
| TLE1                        | -0.933984821 | 0.0734861   |
| NUDT12                      | -0.936308769 | 0.059268219 |
| C330006A16RIK               | -0.936955917 | 0.037937888 |
| CHR12:17888352-17907493_F   | -0.939762566 | 0.099516918 |
| HCRTR1                      | -0.945085768 | 0.007581085 |
| ACAT1                       | -0.94856341  | 0.029429781 |
| CHR12:81719382-81731865_F   | -0.953482625 | 0.014937438 |
| FAM126B                     | -0.956784115 | 0.043182203 |
| GM38521                     | -0.957775613 | 0.079872805 |
| NAP093892-001               | -0.960139433 | 0.099516918 |
| CIR1                        | -0.960592962 | 0.059268219 |
| SLC38A10                    | -0.962444579 | 0.014937438 |
| SETD1B                      | -0.963838254 | 0.037937888 |
| ACOX3                       | -0.964779403 | 0.024306258 |
| GM4470                      | -0.964889622 | 0.029429781 |
| ERLEC1                      | -0.966978456 | 0.029429781 |
| DLX3                        | -0.970611312 | 0.099516918 |
| EFNA5                       | -0.970863724 | 0.0734861   |
| WDR34                       | -0.971454732 | 0.043182203 |
| MET                         | -0.976863179 | 0.014937438 |
| 1700024P12RIK               | -0.97888967  | 0.024306258 |
| DENND6B                     | -0.979443478 | 0.024306258 |
| CHR15:78404840-78412046_R   | -0.986297164 | 0.029429781 |
| CHR15:102947390-102971082_F | -0.991934303 | 0.024306258 |
| EPN3                        | -0.99533442  | 0.005147085 |
| PHKG2                       | -0.997699909 | 0.053870316 |
| AP4M1                       | -1.003650881 | 0.024306258 |
| CES1B                       | -1.005995126 | 0.009923494 |
| ENSMUST00000119830          | -1.007961627 | 0.037937888 |
| A_55_P2083149               | -1.008728747 | 0.043182203 |
| UGT2B38                     | -1.010810683 | 0.043182203 |
| HSD3B6                      | -1.012570394 | 0.005818331 |
| ENSMUST00000177892          | -1.013387048 | 0.005147085 |
| A_55_P2040773               | -1.013927465 | 0.037937888 |

|                            |              |             |
|----------------------------|--------------|-------------|
| CYP46A1                    | -1.015479513 | 0.0734861   |
| OLFR128                    | -1.017585619 | 0.002188424 |
| ORMDL2                     | -1.018483657 | 0.099516918 |
| HIPK4                      | -1.023010794 | 0.043182203 |
| CHR7:134375931-134376644_R | -1.024175781 | 0.043182203 |
| CYP4F13                    | -1.025561317 | 0.001466487 |
| POLI                       | -1.03523186  | 0.0734861   |
| HSD3B3                     | -1.037561789 | 0.059268219 |
| LGALS8                     | -1.045257465 | 0.014937438 |
| CYB5D1                     | -1.046969998 | 0.005147085 |
| KLHDC7A                    | -1.050112078 | 0.053870316 |
| GPC1                       | -1.050470369 | 0.024306258 |
| 0610011F06RIK              | -1.053335285 | 0.029429781 |
| A_55_P2018307              | -1.055704757 | 0.014937438 |
| CHR16:13468953-13474394_F  | -1.056026085 | 0.099516918 |
| GM4013                     | -1.056581965 | 0.014937438 |
| TC1608815                  | -1.057994969 | 0.005818331 |
| FOXN3                      | -1.059486872 | 0.024306258 |
| DARS                       | -1.059607975 | 0.023459349 |
| GGACT                      | -1.062151716 | 0.005818331 |
| ESRP2                      | -1.062595062 | 0.023459349 |
| ENSMUST00000119126         | -1.064502253 | 0.059268219 |
| PRR5                       | -1.065806709 | 0.0734861   |
| DHDH                       | -1.066809238 | 0.099516918 |
| A_55_P2010539              | -1.067620243 | 0.037937888 |
| ENSMUST00000179479         | -1.069629834 | 0.087334443 |
| KRTAP19-5                  | -1.073291707 | 0.014937438 |
| HSD3B2                     | -1.074637102 | 0.028990591 |
| LHX1OS                     | -1.079640847 | 0.037937888 |
| GM32934                    | -1.082758986 | 0.005147085 |
| DVL3                       | -1.082940712 | 0.003669217 |
| PNLDC1                     | -1.085478128 | 0.059268219 |
| MPV17L                     | -1.085839512 | 0.099516918 |
| CHR1:71939741-71947891_F   | -1.088096702 | 0.099516918 |
| CHR10:87822148-87841825_R  | -1.088729278 | 0.005818331 |
| ENSMUST00000086909         | -1.094650826 | 0.003669217 |
| A_55_P2048660              | -1.102113848 | 0.005818331 |
| TMEM158                    | -1.102447413 | 0.009923494 |
| PIGC                       | -1.102954085 | 0.011102126 |
| MPDZ                       | -1.10857045  | 0.0734861   |
| GM11213                    | -1.1096467   | 0.005147085 |
| CMTM6                      | -1.110395571 | 0.011102126 |
| GLUL                       | -1.111557528 | 0.0734861   |
| CHR7:50509139-50526856_R   | -1.113027381 | 0.0734861   |
| A_55_P2168599              | -1.116385668 | 0.043182203 |
| ABHD17C                    | -1.122894418 | 0.023459349 |
| AU020094                   | -1.124187225 | 0.024306258 |
| FRMD8OS                    | -1.131404264 | 0.0734861   |
| RNF103                     | -1.13140447  | 0.0734861   |

|                            |              |             |
|----------------------------|--------------|-------------|
| AOX3                       | -1.132559548 | 0.089012317 |
| PQLC1                      | -1.134770761 | 0.037937888 |
| NAP114395-1                | -1.137056218 | 0.000954713 |
| TC1637255                  | -1.137107429 | 0.009923494 |
| TC1640761                  | -1.13780723  | 0.009923494 |
| MUP-PS16                   | -1.137969404 | 0.024306258 |
| 2900072G11RIK              | -1.137989485 | 0.023459349 |
| CHR7:134369091-134376468_F | -1.139238176 | 0.005818331 |
| ENSMUST00000155958         | -1.141694481 | 0.0734861   |
| AK2                        | -1.146312502 | 0.043182203 |
| GRB14                      | -1.147385666 | 0.000954713 |
| UPK1A                      | -1.151997811 | 0.024306258 |
| HSF2                       | -1.153000531 | 0.000774517 |
| 1500004F05RIK              | -1.153825579 | 0.004840579 |
| 4732419C18RIK              | -1.154149417 | 0.099516918 |
| MPST                       | -1.154868114 | 0.005818331 |
| VMN1R63                    | -1.161615463 | 0.099516918 |
| CARS                       | -1.163206051 | 0.059268219 |
| N4BP2                      | -1.163477182 | 0.012257839 |
| PPP1R16B                   | -1.163514041 | 0.0734861   |
| SLC17A2                    | -1.166968603 | 0.024306258 |
| ENSMUST00000117213         | -1.168264997 | 0.014937438 |
| AYM1                       | -1.169282061 | 0.002188424 |
| KRTAP19-4                  | -1.171591129 | 0.001466487 |
| DDO                        | -1.171998383 | 0.024306258 |
| HAO1                       | -1.172888344 | 0.002188424 |
| GM4951                     | -1.173219605 | 0.029429781 |
| OLFR544                    | -1.174526181 | 0.007924415 |
| ACSM1                      | -1.176159687 | 0.005818331 |
| ELOVL2                     | -1.178354499 | 0.012257839 |
| GM4881                     | -1.1791624   | 0.005818331 |
| GM10216                    | -1.179364089 | 0.014937438 |
| D630039A03RIK              | -1.179763264 | 0.005818331 |
| MGMT                       | -1.183633457 | 0.059268219 |
| ENSMUST00000131638         | -1.185757713 | 0.043182203 |
| TMEM254A                   | -1.188154923 | 0.005147085 |
| GPCPD1                     | -1.188420351 | 0.029429781 |
| ENSMUST00000117580         | -1.192377563 | 0.007581085 |
| UTP14A                     | -1.197260308 | 0.079872805 |
| COX8B                      | -1.197997593 | 0.089012317 |
| SLC10A5                    | -1.204428218 | 0.037937888 |
| SCN5A                      | -1.208412712 | 0.087334443 |
| GHR                        | -1.213080408 | 0.009923494 |
| SLC2A9                     | -1.213424068 | 0.002188424 |
| C030009H01RIK              | -1.218357989 | 0.000774517 |
| ABCA8B                     | -1.222969237 | 0.001466487 |
| GM9924                     | -1.224068489 | 0.053870316 |
| Mrz 02                     | -1.227660163 | 0.099516918 |
| COPS7B                     | -1.228051918 | 0.005147085 |



|                            |              |             |
|----------------------------|--------------|-------------|
| A_55_P2097972              | -1.235317713 | 0.005818331 |
| CHR5:124489025-124506750_F | -1.240017159 | 0.007581085 |
| CHR9:65647428-65677119_R   | -1.241822875 | 0.023459349 |
| DMTF1                      | -1.244898776 | 0.0734861   |
| A930009L07RIK              | -1.25048597  | 0.079872805 |
| PTK7                       | -1.252471627 | 0.011102126 |
| 1700022A21RIK              | -1.252605672 | 0.000774517 |
| WDR91                      | -1.257879974 | 0.028990591 |
| LOC105243194               | -1.261512364 | 0.024306258 |
| CHR17:39983902-39985688_F  | -1.263318786 | 0.037937888 |
| LPO                        | -1.269552613 | 0.099516918 |
| ENSMUST00000110832         | -1.27657604  | 0.099516918 |
| PURA                       | -1.278548454 | 0.029429781 |
| NPR2                       | -1.287624533 | 0.000166554 |
| FBXL20                     | -1.288357964 | 0.059268219 |
| ERN1                       | -1.297023788 | 0.000346571 |
| CYP2D11                    | -1.299373375 | 7.10E-05    |
| ADCK5                      | -1.299533724 | 0.087334443 |
| WHSC1L1                    | -1.300418415 | 0.002188424 |
| PPARA                      | -1.301069261 | 0.029429781 |
| ENSMUST00000068783         | -1.302388902 | 0.014937438 |
| ENSMUST00000114694         | -1.306284879 | 0.029429781 |
| ARHGAP32                   | -1.307676973 | 0.000774517 |
| MUP20                      | -1.307888942 | 0.005147085 |
| TCF24                      | -1.316840966 | 0.0734861   |
| UGT2B5                     | -1.320298374 | 0.002188424 |
| CYP2D34                    | -1.320668065 | 0.000346571 |
| CCDC157                    | -1.329331047 | 0.0734861   |
| SCYL3                      | -1.331729901 | 0.043182203 |
| RBPJ                       | -1.334304981 | 0.000226234 |
| A_55_P2144090              | -1.337351955 | 0.005818331 |
| VMN1R87                    | -1.340893501 | 0.005147085 |
| ENSMUST00000142141         | -1.34500646  | 0.0734861   |
| NAP112345-1                | -1.345552308 | 0.000107205 |
| CHR10:81680941-81704964_R  | -1.346845943 | 0.049978137 |
| FSCN3                      | -1.347732356 | 1.71E-05    |
| A_55_P2178388              | -1.352991915 | 0.079872805 |
| CYP2D9                     | -1.353579738 | 0.000506785 |
| TC1670009                  | -1.357462366 | 0.023459349 |
| SERPINA11                  | -1.360415533 | 0.043182203 |
| SLC4A2                     | -1.361450407 | 6.75E-05    |
| RTP3                       | -1.365394337 | 0.024306258 |
| GNAT2                      | -1.367759118 | 0.003669217 |
| GM7768                     | -1.369961101 | 0.0734861   |
| NR1H4                      | -1.370886038 | 0.005147085 |
| ADGRF1                     | -1.373906653 | 0.009923494 |
| ENSMUST00000170486         | -1.376296213 | 0.099516918 |
| PBLD2                      | -1.383111254 | 0.043182203 |
| A_55_P2116794              | -1.386233653 | 0.000506785 |

|                            |              |             |
|----------------------------|--------------|-------------|
| FOXD3                      | -1.386803126 | 0.014937438 |
| AI317395                   | -1.400969674 | 0.043182203 |
| MS4A3                      | -1.402251196 | 0.099516918 |
| TC1758295                  | -1.411633609 | 0.037937888 |
| COMT                       | -1.412082353 | 0.005818331 |
| UGT2B37                    | -1.416163965 | 0.000506785 |
| CHR1:85304494-85305390_R   | -1.419415145 | 3.84E-05    |
| GM6252                     | -1.42351622  | 0.0734861   |
| RHOX2E                     | -1.423844568 | 0.000107205 |
| ENSMUST00000160443         | -1.429098882 | 0.004840579 |
| CHR18:35142575-35269099_F  | -1.44683145  | 0.011102126 |
| GRIK5                      | -1.448546108 | 0.000774517 |
| SDR42E1                    | -1.450789733 | 0.005147085 |
| ABLIM3                     | -1.45357556  | 0.014937438 |
| TC1603266                  | -1.459474942 | 0.002188424 |
| TTC39B                     | -1.465473628 | 0.059268219 |
| INO80B                     | -1.471962429 | 0.023459349 |
| C78653                     | -1.473233349 | 0.029429781 |
| GM10387                    | -1.483378859 | 0.089012317 |
| TESCL                      | -1.494155742 | 0.0734861   |
| MESP2                      | -1.495717849 | 0.002188424 |
| ENSMUST00000117241         | -1.497507044 | 1.71E-05    |
| TCF7L2                     | -1.50216804  | 0.053870316 |
| MIA2                       | -1.507950534 | 0.023459349 |
| A_55_P2110671              | -1.522010802 | 0.0734861   |
| PTK2B                      | -1.528116628 | 3.24E-07    |
| A830052D11RIK              | -1.529657109 | 0.053870316 |
| TTC39C                     | -1.5325637   | 1.31E-06    |
| HSBP1L1                    | -1.534193903 | 1.40E-06    |
| MN1                        | -1.543814829 | 0.029429781 |
| CHR9:41368823-41369514_F   | -1.546235123 | 0.099516918 |
| F11                        | -1.551677484 | 1.20E-06    |
| PDCD4                      | -1.571922804 | 0.059268219 |
| NAP017825-001              | -1.574751594 | 0.005818331 |
| SULT1B1                    | -1.580479927 | 0.007581085 |
| GM10319                    | -1.597878568 | 0.099516918 |
| RBBP8NL                    | -1.617695139 | 0.0734861   |
| D130020L05RIK              | -1.634778695 | 0.000189142 |
| CYP2C44                    | -1.651348007 | 0.000506785 |
| PCP4                       | -1.656206616 | 0.037937888 |
| CHR5:137395007-137412976_F | -1.671432312 | 0.014937438 |
| ADH4                       | -1.676165876 | 0.0734861   |
| 5830473C10RIK              | -1.680080382 | 0.099516918 |
| ARSG                       | -1.680520024 | 3.84E-05    |
| ENSMUST00000006786         | -1.696290337 | 0.003229661 |
| IGF1OS                     | -1.700733092 | 0.012257839 |
| SOHLH2                     | -1.701973869 | 0.009923494 |
| ENSMUST00000178355         | -1.703229861 | 0.059268219 |
| BB759059                   | -1.708061952 | 0.024306258 |

|                            |              |             |
|----------------------------|--------------|-------------|
| HOPX                       | -1.714965065 | 3.50E-06    |
| GM5106                     | -1.718248164 | 0.000346571 |
| GM32743                    | -1.719782174 | 0.005818331 |
| CCBL1                      | -1.729289087 | 0.000346571 |
| MBL2                       | -1.730021705 | 0.0734861   |
| A_55_P2055423              | -1.735685626 | 0.053870316 |
| ENSMUST00000156405         | -1.736935994 | 0.002188424 |
| MAPT                       | -1.74444083  | 1.85E-06    |
| UGT3A2                     | -1.761274696 | 0.043182203 |
| RNASE10                    | -1.762157381 | 0.029429781 |
| 9330151L19RIK              | -1.762618962 | 0.004840579 |
| ENSMUST00000178292         | -1.76359256  | 0.001466487 |
| RD3                        | -1.790340379 | 0.003669217 |
| TBX3                       | -1.791334689 | 0.029429781 |
| GPR162                     | -1.81038102  | 0.014937438 |
| ENSMUST00000119215         | -1.81313112  | 0.014937438 |
| ENSMUST00000188378         | -1.849210632 | 0.001466487 |
| ACSL1                      | -1.849429656 | 0.023459349 |
| CHR5:113771679-113771745_F | -1.870888487 | 0.014937438 |
| RARRES1                    | -1.873071647 | 0.005818331 |
| CLEC2E                     | -1.87657829  | 0.000954713 |
| CYP2D37-PS                 | -1.882848989 | 0.014937438 |
| B3GALT1                    | -1.883919189 | 0.059268219 |
| 2310047N11RIK              | -1.890649479 | 0.029429781 |
| ENSMUST00000166759         | -1.892271503 | 0.007924415 |
| SLCO2B1                    | -1.894342247 | 0.014937438 |
| F830016B08RIK              | -1.901167232 | 0.000506785 |
| ENSMUST00000092891         | -1.907744114 | 1.32E-07    |
| AI463229                   | -1.919942786 | 6.76E-06    |
| GM12992                    | -1.924421185 | 0.000774517 |
| REC8                       | -1.92865837  | 0.005818331 |
| GM10765                    | -1.934834104 | 1.45E-11    |
| AK036131                   | -1.938354988 | 0.099516918 |
| GM4673                     | -1.965690811 | 3.24E-07    |
| ARRDC3                     | -1.967692956 | 0.011102126 |
| A_55_P2045859              | -1.974519216 | 7.02E-09    |
| BCO2                       | -1.977644673 | 0.000107205 |
| ALAS2                      | -1.99085944  | 0.099516918 |
| CYP4F14                    | -2.000992542 | 0.004640056 |
| CHR19:36699712-36763966_R  | -2.01004913  | 0.014937438 |
| MRGPRG                     | -2.010581277 | 0.014937438 |
| SYT1                       | -2.017004043 | 2.93E-07    |
| CXCL9                      | -2.018711434 | 0.037937888 |
| FABP2                      | -2.052084919 | 0.004840579 |
| CYP2J9                     | -2.061549821 | 3.84E-05    |
| BDH2                       | -2.0746301   | 0.003669217 |
| FAM183B                    | -2.079054749 | 0.002188424 |
| ENSMUST00000028205         | -2.082093006 | 0.037937888 |
| NEB                        | -2.088614503 | 0.029429781 |

|                           |              |             |
|---------------------------|--------------|-------------|
| A_55_P2124361             | -2.091005251 | 1.35E-13    |
| A730091E23RIK             | -2.097909594 | 0.079872805 |
| SRD5A1                    | -2.111880014 | 1.37E-05    |
| HSD17B2                   | -2.130912949 | 5.01E-08    |
| MEP1B                     | -2.136805137 | 0.001466487 |
| LEAP2                     | -2.172101736 | 0.0734861   |
| GM6329                    | -2.209993804 | 1.80E-08    |
| SULT2A7                   | -2.220379379 | 0.053870316 |
| SERPINA3K                 | -2.25640947  | 1.71E-05    |
| CHRNA2                    | -2.273732358 | 6.85E-07    |
| CYP2D13                   | -2.277721358 | 3.24E-07    |
| CMAH                      | -2.342498594 | 3.24E-07    |
| CES1E                     | -2.363835114 | 0.005818331 |
| GBP6                      | -2.396856406 | 0.014937438 |
| IGF1                      | -2.402914748 | 1.35E-13    |
| SCNN1A                    | -2.404642653 | 0.005818331 |
| CYP2J5                    | -2.411382469 | 0.000346571 |
| C8B                       | -2.430080327 | 1.35E-13    |
| SLC17A8                   | -2.432659842 | 0.053870316 |
| ENSMUST00000079597        | -2.443126969 | 0.0734861   |
| 1700054M17RIK             | -2.449681192 | 0.0734861   |
| PPP1R3C                   | -2.456839628 | 0.024306258 |
| 1810008I18RIK             | -2.481004715 | 0.0734861   |
| NCMAP                     | -2.485925713 | 1.35E-13    |
| ENSMUST00000179900        | -2.514262792 | 6.85E-07    |
| CEBPE                     | -2.528545887 | 1.71E-05    |
| RS5-8S1                   | -2.54361983  | 0.043182203 |
| TSPAN33                   | -2.563997001 | 1.35E-13    |
| PAQR9                     | -2.583750465 | 0.011102126 |
| KRT80                     | -2.589493921 | 1.37E-05    |
| GM128                     | -2.618935985 | 7.10E-05    |
| AK157043                  | -2.630704357 | 1.31E-06    |
| TIAM2                     | -2.692593713 | 0.099516918 |
| MUP-PS12                  | -2.692741763 | 0.000774517 |
| 5730414N17RIK             | -2.698411338 | 3.84E-05    |
| SERPINA3H                 | -2.707920948 | 2.81E-09    |
| EGFR                      | -2.714474074 | 6.15E-07    |
| UGT2A3                    | -2.716220262 | 5.44E-07    |
| CHR15:99765243-99783300_F | -2.726867248 | 0.000346571 |
| RIPPLY2                   | -2.734981179 | 0.004640056 |
| PDILT                     | -2.738114204 | 1.35E-13    |
| GM10556                   | -2.749978864 | 0.000107205 |
| AQP4                      | -2.760360176 | 0.029429781 |
| IGLON5                    | -2.770799967 | 5.44E-06    |
| LAMA3                     | -2.78438832  | 0.000506785 |
| CYP2C67                   | -2.823433355 | 3.06E-09    |
| SOCS2                     | -2.915032471 | 4.86E-05    |
| SLC13A2                   | -2.921418223 | 0.089012317 |
| A_55_P2019989             | -2.945547649 | 0.000774517 |

|                    |              |             |
|--------------------|--------------|-------------|
| ENSMUST00000119998 | -2.978686944 | 2.44E-09    |
| EXTL1              | -3.029211053 | 0.000167342 |
| SDR9C7             | -3.045165597 | 1.37E-05    |
| LHX3               | -3.061743753 | 0.005818331 |
| MCM10              | -3.063168841 | 6.76E-06    |
| MUP3               | -3.075321987 | 1.35E-13    |
| NREP               | -3.079776675 | 1.37E-05    |
| MUP4               | -3.10264112  | 1.35E-13    |
| GNA14              | -3.119396527 | 0.007581085 |
| SLC22A28           | -3.135592263 | 1.45E-11    |
| NUDT7              | -3.166999906 | 1.85E-06    |
| PAX2               | -3.172269525 | 1.31E-06    |
| UGT2B1             | -3.21278232  | 3.84E-05    |
| CYP2C68            | -3.214429804 | 3.39E-08    |
| ENSMUST00000126217 | -3.244938218 | 5.44E-07    |
| A_55_P2153191      | -3.249711767 | 0.001466487 |
| ABCA8A             | -3.250805497 | 6.85E-07    |
| BC025829           | -3.349585551 | 0.024306258 |
| PROK1              | -3.354149352 | 1.35E-13    |
| ENSMUST00000121473 | -3.428041087 | 0.043182203 |
| ENSMUST00000073521 | -3.643994154 | 0.000774517 |
| ZAP70              | -3.64509225  | 5.69E-06    |
| SNTG2              | -3.668118163 | 1.35E-13    |
| INHBE              | -3.673841445 | 3.84E-05    |
| SERPINA12          | -3.864739397 | 1.45E-11    |
| 1700016K05RIK      | -3.872802363 | 1.35E-13    |
| CSRP3              | -3.875344883 | 0.002188424 |
| A_55_P1952156      | -3.924589273 | 3.39E-08    |
| C730036E19RIK      | -3.930395708 | 3.39E-08    |
| DCT                | -4.072246939 | 0.049978137 |
| SUSD4              | -4.217008895 | 6.15E-07    |
| ENSMUST00000171077 | -4.253122933 | 3.39E-08    |
| MUP5               | -4.388002112 | 1.35E-13    |
| MUP1               | -4.408016739 | 0.002188424 |
| CYP7B1             | -4.501747394 | 1.35E-13    |
| SULT5A1            | -4.513003678 | 2.44E-09    |
| CML5               | -4.519837469 | 0.001466487 |
| CSPG5              | -4.571665023 | 0.000107205 |
| IGFALS             | -4.674482341 | 1.32E-07    |
| SLC22A30           | -4.68994555  | 0.000506785 |
| OLFR1535           | -4.826866365 | 3.39E-08    |
| ACSM2              | -4.960168739 | 1.45E-11    |
| CES1F              | -4.977875238 | 0.001466487 |
| CES4A              | -5.251422438 | 1.35E-13    |
| 2810007J24RIK      | -5.355062789 | 8.29E-11    |
| OLFR125            | -5.411922924 | 1.35E-13    |
| LOC545966          | -5.569226448 | 0.002188424 |
| ENSMUST00000120662 | -5.585602075 | 0.005818331 |
| GM3734             | -5.715481795 | 1.35E-13    |

|                    |              |             |
|--------------------|--------------|-------------|
| KEG1               | -5.825939868 | 2.18E-11    |
| ENSMUST00000178663 | -6.218434989 | 0.053870316 |
| CLEC2H             | -6.406953676 | 3.39E-08    |
| MUP2               | -6.563348897 | 0.043182203 |
| SERPINA9           | -6.646456569 | 1.35E-13    |
| CES3A              | -6.673014005 | 0.000189142 |
| MUP21              | -6.799687296 | 1.35E-13    |
| ENSMUST00000154733 | -7.208291889 | 4.45E-05    |
| ENSMUST00000121741 | -7.262909762 | 1.35E-13    |
| MUP6               | -7.304048719 | 1.35E-13    |
| TC1687046          | -7.561199041 | 0.000107205 |
| CES3B              | -7.791466993 | 3.24E-07    |
| SLCO1A1            | -7.835438272 | 1.35E-13    |
| CYP4A12A           | -8.427628064 | 1.35E-13    |
| ELOVL3             | -9.066127339 | 1.35E-13    |
| SERPINA4-PS1       | -9.745270049 | 1.35E-13    |
| CYP4A12B           | -9.906360031 | 1.35E-13    |
| HSD3B5             | -10.93628773 | 1.35E-13    |

Table represents differentially regulated genes. RNA was extracted whole liver tissue from *Rbpj<sup>+/+</sup>* and *Rbpj<sup>-/-</sup>* mice at the age of 4 weeks. Log2 fold change and false discovery rate is listed for each single gene ( $n = 3-4$ , Shrinkage T-test,  $fdr < 0.1$ ).

Table S3. Regulation of Hippo pathway genes.

| Gene     | Log2 Fold Change | False Discovery Rate |
|----------|------------------|----------------------|
| SERPINE1 | 4.961996904      | 0.482212591          |
| WNT10A   | 4.110943424      | 1.35E-13             |
| BMP8B    | 3.071683723      | 0.011102126          |
| AFP      | 2.934659184      | 6.15E-07             |
| BIRC5    | 2.329030992      | 0.1350845            |
| CTGF     | 2.261069356      | 0.345591697          |
| ACTG1    | 1.972301746      | 0.000167342          |
| CCND1    | 1.857258085      | 0.005147085          |
| ID4      | 1.79610855       | 0.0734861            |
| WNT9B    | 1.584973069      | 1                    |
| AJUBA    | 1.503185704      | 0.132349936          |
| TGFBR2   | 1.321543879      | 0.001538172          |
| MYC      | 1.288861505      | 1                    |
| WTIP     | 1.268670756      | 0.176355558          |
| YWHAH    | 1.222379889      | 0.005818331          |
| FZD3     | 1.220547374      | 1                    |
| ITGB2    | 1.196566353      | 0.089012317          |
| MOB1A    | 1.196559574      | 1                    |
| TEAD4    | 1.176534934      | 1                    |
| TEAD1    | 1.104763387      | 0.345591697          |
| TEAD2    | 1.0971577        | 0.059268219          |
| AREG     | 1.073652426      | 1                    |
| BMP6     | 1.058613337      | 1                    |

|         |             |             |
|---------|-------------|-------------|
| WWTR1   | 1.009861007 | 0.0734861   |
| TGFB1   | 1.006877153 | 0.029429781 |
| PARD6G  | 0.950287983 | 1           |
| TGFB2   | 0.926845804 | 1           |
| TGFB3   | 0.79943766  | 1           |
| CTNNA3  | 0.773674256 | 1           |
| YWHAQ   | 0.762777475 | 0.199556568 |
| RASSF1  | 0.739434338 | 0.482212591 |
| CSNK1E  | 0.730945389 | 1           |
| PPP2CB  | 0.679223995 | 1           |
| SMAD2   | 0.647855579 | 1           |
| PPP1CB  | 0.617266098 | 1           |
| CCND3   | 0.594634174 | 0.345591697 |
| BIRC2   | 0.576553277 | 1           |
| YWHAB   | 0.576212712 | 1           |
| PPP2R1A | 0.565919314 | 1           |
| PPP1CC  | 0.539831583 | 1           |
| CDH1    | 0.519201066 | 1           |
| FBXW11  | 0.50747507  | 1           |
| CTNNB1  | 0.501578632 | 1           |
| INADL   | 0.494572662 | 1           |
| CTNNA1  | 0.490333843 | 1           |
| AMOT    | 0.470649671 | 1           |
| SMAD1   | 0.457994387 | 1           |
| BMP7    | 0.45400364  | 1           |
| ITGB2L  | 0.415932961 | 1           |
| YWHAZ   | 0.407391768 | 1           |
| PPP2R2A | 0.404829188 | 1           |
| YWHAG   | 0.384962691 | 1           |
| LATS2   | 0.370249957 | 1           |
| SMAD3   | 0.367968934 | 1           |
| CRB2    | 0.35041503  | 1           |
| BMPR2   | 0.347813504 | 1           |
| DLG4    | 0.339074595 | 1           |
| FRMD6   | 0.328064169 | 1           |
| PPP2R2B | 0.327735468 | 1           |
| PPP1CA  | 0.327252809 | 1           |
| WNT4    | 0.323268751 | 1           |
| DVL2    | 0.314914989 | 1           |
| CCND2   | 0.309816069 | 1           |
| WNT3    | 0.28929643  | 1           |
| PPP2CA  | 0.277436433 | 1           |
| SMAD4   | 0.240689517 | 1           |
| WWC1    | 0.239226946 | 1           |
| PPP2R2D | 0.229525677 | 1           |
| CRB1    | 0.226894667 | 1           |
| ACTB    | 0.224646095 | 1           |
| TGFBR1  | 0.212771303 | 1           |
| AXIN1   | 0.208146439 | 1           |

|          |              |   |
|----------|--------------|---|
| GLI2     | 0.207863093  | 1 |
| CSNK1D   | 0.198813092  | 1 |
| TRP53BP2 | 0.194320567  | 1 |
| PRKCI    | 0.190498694  | 1 |
| WNT7A    | 0.174333711  | 1 |
| NF2      | 0.165164653  | 1 |
| CTNNA2   | 0.14315798   | 1 |
| PAR6A    | 0.129413465  | 1 |
| YWHAE    | 0.128349186  | 1 |
| SAV1     | 0.126428978  | 1 |
| WNT5B    | 0.118672115  | 1 |
| FZD5     | 0.109693485  | 1 |
| GSK3B    | 0.100610005  | 1 |
| WNT11    | 0.099830393  | 1 |
| NKD1     | 0.077278888  | 1 |
| RASSF6   | 0.067144656  | 1 |
| BTRC     | 0.064439621  | 1 |
| GDF6     | 0.054720129  | 1 |
| SMAD7    | 0.050913177  | 1 |
| DLG2     | 0.050437738  | 1 |
| PPP2R1B  | 0.037083912  | 1 |
| PPP2R2C  | 0.03404266   | 1 |
| ID3      | 0.033633461  | 1 |
| WNT2B    | 0.01418438   | 1 |
| BMP2     | 0.010499537  | 1 |
| BMPR1A   | -0.002060653 | 1 |
| FZD10    | -0.026662878 | 1 |
| STK3     | -0.029818479 | 1 |
| FZD1     | -0.032364003 | 1 |
| SNAI2    | -0.051875497 | 1 |
| SCRIB    | -0.053718284 | 1 |
| TCF7L1   | -0.054855001 | 1 |
| GDF7     | -0.082544032 | 1 |
| AMH      | -0.084143753 | 1 |
| FZD2     | -0.084743419 | 1 |
| TCF7     | -0.101957677 | 1 |
| MPP5     | -0.137134254 | 1 |
| LIMD1    | -0.137785049 | 1 |
| DVL1     | -0.138307415 | 1 |
| ID1      | -0.140511454 | 1 |
| FZD6     | -0.142051892 | 1 |
| WNT16    | -0.15437104  | 1 |
| DLG1     | -0.160160012 | 1 |
| WNT3A    | -0.160911247 | 1 |
| LLGL1    | -0.174908691 | 1 |
| YAP1     | -0.19584197  | 1 |
| FZD4     | -0.209718764 | 1 |
| BMP5     | -0.213036174 | 1 |
| SOX2     | -0.221273069 | 1 |



|        |              |             |
|--------|--------------|-------------|
| WNT5A  | -0.23747125  | 1           |
| WNT10B | -0.290286253 | 1           |
| APC2   | -0.294596009 | 1           |
| LATS1  | -0.294723469 | 1           |
| WNT7B  | -0.339633939 | 1           |
| PARD6B | -0.35260349  | 1           |
| APC    | -0.353384327 | 1           |
| PRKCZ  | -0.358286142 | 1           |
| LEF1   | -0.362600671 | 1           |
| WNT9A  | -0.396819769 | 1           |
| MOB1B  | -0.423065576 | 1           |
| LLGL2  | -0.460543643 | 1           |
| DLG3   | -0.461184175 | 1           |
| TEAD3  | -0.484223174 | 1           |
| PARD3  | -0.533816082 | 1           |
| WNT2   | -0.537021563 | 1           |
| TRP73  | -0.538973665 | 1           |
| AXIN2  | -0.546825621 | 1           |
| BMP4   | -0.552484074 | 1           |
| FZD7   | -0.575967222 | 1           |
| WNT1   | -0.611269258 | 1           |
| BMPR1B | -0.645831753 | 1           |
| WNT8A  | -0.673180729 | 1           |
| BMP8A  | -0.714266045 | 1           |
| ID2    | -0.726289451 | 1           |
| GDF5   | -0.77301589  | 1           |
| WNT6   | -0.803197414 | 1           |
| BBC3   | -0.857864811 | 1           |
| WNT8B  | -0.999313544 | 1           |
| FGF1   | -0.999992498 | 0.176355558 |
| FZD9   | -1.023702172 | 1           |
| DVL3   | -1.082940712 | 0.003669217 |
| FZD8   | -1.228532511 | 1           |
| TCF7L2 | -1.50216804  | 0.053870316 |

Table presents overview of log2 fold change expression (*Rbpj<sup>+/+</sup>* vs. *Rbpj<sup>-/-</sup>* mice) for all Hippo pathway genes ( $n = 3-4$ , Shrinkage T-test,  $fdr \leq 1$ ).

Table S4. Antibodies.

| Antibody       | Company                  | Catalog Number | Dilution (IHC) | Dilutions (WB) |
|----------------|--------------------------|----------------|----------------|----------------|
| Albumin        | Bethyl                   | A90-135        | 1:100          | -              |
| CD45           | BD Pharmingen            | 550539         | 1:200          | -              |
| Cytokeratin 7  | Abcam                    | ab181598       | 1:300          | -              |
| Cytokeratin 19 | Santa Cruz               | sc-33111       | 1:250          | -              |
| F4/80          | ThermoFischer Scientific | MA5-16624      | 1:200          | -              |
| HNF4 $\alpha$  | ThermoFischer Scientific | K9218          | 1:200          | -              |
| IQGAP1         | Santa Cruz               | sc-376021      | 1:200          | 1:1000         |

|          |                            |        |       |        |
|----------|----------------------------|--------|-------|--------|
| PCNA     | MerckMillipore(Calbiochem) | NA03   | 1:150 | 1:1000 |
| RBPJ     | Cosmo Bio                  | 2ZRBP3 | 1:200 | 1:1000 |
| SOX-9    | Merck - Millipore          | AB5535 | 1:500 | -      |
| YAP1     | Cell Signaling             | 14074  | 1:200 | -      |
| YAP1     | Cell Signaling             | 4912   | -     | 1:1000 |
| Lamin B1 | Santa Cruz                 | 374015 | -     | 1:500  |

Table presents a list of used antibodies for IHC/IF and western blot.

Table S5. Primer.

| Gene                     | Forward Primer (5'→3')                            | Reverse Primer (5'→3')  |
|--------------------------|---------------------------------------------------|-------------------------|
| <i>αSMA</i>              | TCACCATTGGAAACGAACG                               | ATAGGTGGTTTCGTGGATGC    |
| <i>Afp</i>               | AGTTTCCAGAACCTGCCGAG                              | CTGGAGGTTTCGGGATCCAA    |
| <i>Ankrd1</i>            | GCTGAACAAAGGAGCCAAA                               | ATAGCGGTTTCAGCCTCACAG   |
| <i>CK19</i>              | GGACCCTCCCGAGATTACAACCA                           | GCCAGCTCCTCCTCAGGCTCT   |
| <i>Col1a1</i>            | CATGTTTCAGCTTTGTGGACCT                            | GCAGCTGACTTCAGGGATGT    |
| <i>Ctgf</i>              | GGGCCTCTTCTGCGATTTC                               | ATCCAGGCAAGTGCATTGGTA   |
| <i>Cyr61</i>             | CTGCGCTAAACAACCTCAACGA                            | GCAGATCCCTTTCAGAGCGG    |
| <i>Dtx1</i>              | CCAACCCAGGCAAGAAGTT                               | GATGAGCAATCTCAGCACCTT   |
| <i>Gpc3</i>              | TGTCACCAGGTCCGTTCTTT                              | GTTGTTCCATGTTTCAGCCGT   |
| <i>Hes1</i>              | TGCCAGCTGATATAATGGAGAA                            | CCATGATAGGCTTTGATGACTTT |
| <i>Hey1</i>              | ACCATCGAGGTGGAAAAGG                               | CTTCTCGATGATGCCTCTCC    |
| <i>Itgb2</i>             | GTGGTGCAGCTCATCAAGAA                              | GCCATGACCTTTACCTGGAA    |
| <i>IQGAP1</i>            | GGCAGAACGTGGCTTATGA                               | AAGGCCCTCCTCTAGCTCTG    |
| <i>Notch1</i>            | CAATGTTTCGAGGACCAGATGG                            | ACTGCAGGAGGCAATCATGAG   |
| <i>Notch2</i>            | TGCCTGTTTGACAACCTTTGAGT                           | GTGGTCTGCACAGTATTTGTCAT |
| <i>Notch3</i>            | AGCTGGGTCCTGAGGTGAT                               | AGACAGAGCCGGTTGTCAAT    |
| <i>Notch4</i>            | GGACCTGCTTGCAACCTTC                               | CCTCACAGAGCCTCCCTTC     |
| <i>Sox9</i>              | TGCCCATGCCCGTGCGCTCAA                             | CGTCCGCCTCCTCCACGAAGGG  |
| <i>Tead2</i>             | GGAAGGCAGCGAAGAGGGC                               | CTTACGTCTGGAACATTCCAT   |
| <i>YAP</i>               | CCTGATGATGTACCACTGCC                              | GCCATGTTGTTGTCTGATCG    |
| <i>RNA polymerase II</i> | CATCAACCAGGTGGTACAGC                              | GATTCTGGAACCTCAACTCTCC  |
| <i>Rbpj</i>              | Mm_Rbpj_1_SG QuantiTect Primer Assay (QT00142821) |                         |

Table presents primer and primer sequences used for qRT-PCR.
